# Supplementary material for: Phosphoproteomics Unravel HBV Triggered Rewiring of Host Phosphosignaling Events
Source: Int J Mol Sci. 2022 May 4;23(9):5127. doi: 10.3390/ijms23095127 (PMC9104152; doi:10.3390/ijms23095127)
Supplement: Supplementary file 1 [file ijms-23-05127-s001.zip › Supplementary Table S1.xlsx]

## Sheet: Up-regulated
Supplementary Table S1. Phosphosites of host proteins deregulated at 7dpi
Modifications in Master Proteins	Master Protein Accessions	Master Protein Descriptions	Protein Accessions	HBV/mock	p-value
P42684 1xPhospho [S631(100)]	P42684	Abelson tyrosine-protein kinase 2 OS=Homo sapiens GN=ABL2 PE=1 SV=1	P42684-6; P42684-3; P42684-10; P42684-4; P42684; P42684-5; P42684-7; P42684-2	1.3095	0.0135359
Q12979-2 1xPhospho [T/S]	Q12979-2	Isoform Short of Active breakpoint cluster region-related protein OS=Homo sapiens GN=ABR	Q12979-2	1.6702	0.0152487
Q9UEY8 1xPhospho [S677(100)]	Q9UEY8	Gamma-adducin OS=Homo sapiens GN=ADD3 PE=1 SV=1	Q9UEY8-2; Q9UEY8	1.38758	0.000124031
P55196-5 1xPhospho [S1511(100)]	P55196-5	Isoform 5 of Afadin OS=Homo sapiens GN=AFDN	A8MQ02; P55196-5; P55196-6; P55196-2; P55196-1; Q5TIG5; P55196-3; J3KN01; P55196	1.38594	0.00703668
Q02952 1xPhospho [S483(100)]	Q02952	A-kinase anchor protein 12 OS=Homo sapiens GN=AKAP12 PE=1 SV=4	Q02952; Q02952-3; Q02952-2	1.339	0.00654419
Q12802-2 1xPhospho [S]	Q12802-2	Isoform 2 of A-kinase anchor protein 13 OS=Homo sapiens GN=AKAP13	Q12802-2; Q12802-4; A0A087WTD7; Q12802; A8MYJ1	1.80075	0.00151688
O43823 1xPhospho [S328(100)]	O43823	A-kinase anchor protein 8 OS=Homo sapiens GN=AKAP8 PE=1 SV=1	M0QYL4; O43823	1.35266	0.00767894
A0A0A0MSS8 1xPhospho [S/T/Y]	A0A0A0MSS8	Aldo-keto reductase family 1 member C3 OS=Homo sapiens GN=AKR1C3 PE=1 SV=1	S4R3D5; A0A0A0MSS8; S4R3Z2; P42330	1.3279	0.0255824
O15084-1 1xPhospho [S/T]	O15084-1	Isoform 3 of Serine/threonine-protein phosphatase 6 regulatory ankyrin repeat subunit A OS=Homo sapiens GN=ANKRD28	O15084-1; O15084-4; O15084-2; O15084	1.52948	0.0205273
O14617-2 2xPhospho [S541(100); S]	O14617-2	Isoform 2 of AP-3 complex subunit delta-1 OS=Homo sapiens GN=AP3D1	O14617; O14617-3; O14617-2; O14617-4; O14617-5	1.38727	0.000509676
P04114 1xPhospho [S4048(100)]	P04114	Apolipoprotein B-100 OS=Homo sapiens GN=APOB PE=1 SV=2	P04114	6.39884	9.73774e-05
P02649	P02649	Apolipoprotein E OS=Homo sapiens GN=APOE PE=1 SV=1	E7ERP7; H0Y7L5; E9PEV4; P02649	1.52823	0.000477624
O14791-2 2xPhospho [S327(100); S330(100)]	O14791-2	Isoform 2 of Apolipoprotein L1 OS=Homo sapiens GN=APOL1	O14791-2; O14791; O14791-3	1.95128	0.000119084
P05067 1xPhospho [S441(100)]	P05067	Amyloid beta A4 protein OS=Homo sapiens GN=APP PE=1 SV=3	H7C0V9; P05067-11; P05067-4; P05067-6; A0A0A0MRG2; P05067-9; P05067-7; P05067-8; P05067-3; P05067-5; P05067-10; E9PG40; P05067	1.36125	0.00115532
Q9Y6D5 1xPhospho [S277(99.8)]	Q9Y6D5	Brefeldin A-inhibited guanine nucleotide-exchange protein 2 OS=Homo sapiens GN=ARFGEF2 PE=1 SV=3	Q9Y6D5	1.42521	3.32419e-06
Q9Y6D5 2xPhospho [S]	Q9Y6D5	Brefeldin A-inhibited guanine nucleotide-exchange protein 2 OS=Homo sapiens GN=ARFGEF2 PE=1 SV=3	Q9Y6D5	1.42393	0.0135272
Q9NRY4 1xPhospho [S1179(100)]	Q9NRY4	Rho GTPase-activating protein 35 OS=Homo sapiens GN=ARHGAP35 PE=1 SV=3	Q9NRY4	1.36756	0.000275178
Q14155 1xPhospho [S518(100)]	Q14155	Rho guanine nucleotide exchange factor 7 OS=Homo sapiens GN=ARHGEF7 PE=1 SV=2	Q14155-2; E9PDQ5; Q14155-6; Q15052-2; Q14155-3; Q15052; Q14155-5; Q14155-1; E7EUY6; F6SJA5; Q14155; B1ALK7	1.51471	0.000259395
Q14155 1xPhospho [S518(100)]	Q14155	Rho guanine nucleotide exchange factor 7 OS=Homo sapiens GN=ARHGEF7 PE=1 SV=2	Q14155-2; E9PDQ5; Q14155-6; Q15052-2; Q14155-3; Q15052; Q14155-5; Q14155-1; E7EUY6; F6SJA5; Q14155; B1ALK7	1.49887	0.000338769
Q14155 1xPhospho [S694(100)]	Q14155	Rho guanine nucleotide exchange factor 7 OS=Homo sapiens GN=ARHGEF7 PE=1 SV=2	Q14155-2; E9PDQ5; Q14155-6; Q14155-3; Q14155-5; Q14155-1; Q14155; B1ALK7	1.75731	0.000343981
O14497 1xPhospho [S]	O14497	AT-rich interactive domain-containing protein 1A OS=Homo sapiens GN=ARID1A PE=1 SV=3	H0Y488; A0A1B0GTU5; O14497; O14497-3; O14497-2	1.46988	2.0876e-05
Q99856 1xPhospho [S101(100)]	Q99856	AT-rich interactive domain-containing protein 3A OS=Homo sapiens GN=ARID3A PE=1 SV=2	Q99856	1.48517	0.000808003
Q99856 1xPhospho [S119(100)]	Q99856	AT-rich interactive domain-containing protein 3A OS=Homo sapiens GN=ARID3A PE=1 SV=2	Q99856	1.51691	0.00341825
Q99856 1xPhospho [S119(100)]	Q99856	AT-rich interactive domain-containing protein 3A OS=Homo sapiens GN=ARID3A PE=1 SV=2	Q99856	1.33193	0.0115575
Q99856 1xPhospho [S88(100)]	Q99856	AT-rich interactive domain-containing protein 3A OS=Homo sapiens GN=ARID3A PE=1 SV=2	Q99856	2.07328	0.000135498
Q99856 2xPhospho [S77(100); S81(100)]	Q99856	AT-rich interactive domain-containing protein 3A OS=Homo sapiens GN=ARID3A PE=1 SV=2	Q99856	1.33839	0.000288233
Q99856 2xPhospho [T98(100); S101(100)]	Q99856	AT-rich interactive domain-containing protein 3A OS=Homo sapiens GN=ARID3A PE=1 SV=2	Q99856	1.33431	0.0151129
P29374 2xPhospho [S159(100); S160(100)]	P29374	AT-rich interactive domain-containing protein 4A OS=Homo sapiens GN=ARID4A PE=1 SV=3	C9J1W3; P29374-2; P29374-3; P29374	1.36898	0.00210997
P29374 1xPhospho [S]	P29374	AT-rich interactive domain-containing protein 4A OS=Homo sapiens GN=ARID4A PE=1 SV=3	P29374-2; P29374-3; P29374; H7C485	1.39567	0.000954818
Q8NHH9 1xPhospho [T/S/Y]	Q8NHH9	Atlastin-2 OS=Homo sapiens GN=ATL2 PE=1 SV=2	Q8NHH9-2; Q8NHH9; H7C3A2	1.43069	0.00830632
P25705	P25705	ATP synthase subunit alpha, mitochondrial OS=Homo sapiens GN=ATP5A1 PE=1 SV=1	P25705-2; P25705; P25705-3	1.31433	0.0288066
P46100 1xPhospho [S213(100)]	P46100	Transcriptional regulator ATRX OS=Homo sapiens GN=ATRX PE=1 SV=5	P46100; P46100-3; P46100-4; P46100-6; A0A096LNL6; A0A096LNN3; A0A096LNL9; P46100-5; A0A096LNW1	1.31282	0.014781
P46100 2xPhospho [S675(99.4); S677(99.4)]	P46100	Transcriptional regulator ATRX OS=Homo sapiens GN=ATRX PE=1 SV=5	P46100; P46100-3; P46100-4; P46100-6; A0A096LNL9; P46100-5; A0A096LNW1; P46100-2	1.38097	0.00146248
P54253 1xPhospho [S775(100)]	P54253	Ataxin-1 OS=Homo sapiens GN=ATXN1 PE=1 SV=2	P54253	1.70996	0.00193627
Q7L1Q6-3 1xPhospho [S443(100)]	Q7L1Q6-3	Isoform 3 of Basic leucine zipper and W2 domain-containing protein 1 OS=Homo sapiens GN=BZW1	H0Y503; Q7L1Q6-2; Q7L1Q6-4; Q7L1Q6-3; Q7L1Q6	1.93088	2.03838e-05
P01024 1xPhospho [S297(100)]	P01024	Complement C3 OS=Homo sapiens GN=C3 PE=1 SV=2	P01024	19.8889	0.00022966
P01024 1xPhospho [S297(100)]	P01024	Complement C3 OS=Homo sapiens GN=C3 PE=1 SV=2	P01024	2.03138	4.84275e-05
Q86VP6 1xPhospho [T/S]	Q86VP6	Cullin-associated NEDD8-dissociated protein 1 OS=Homo sapiens GN=CAND1 PE=1 SV=2	A0A0C4DGH5; Q86VP6; Q86VP6-2	1.35381	0.0136033
Q9UK58 1xPhospho [S352(100)]	Q9UK58	Cyclin-L1 OS=Homo sapiens GN=CCNL1 PE=1 SV=1	Q9UK58-6; Q9UK58	1.41675	0.000147241
Q9UK58 2xPhospho [S335(100); S341(99.7)]	Q9UK58	Cyclin-L1 OS=Homo sapiens GN=CCNL1 PE=1 SV=1	Q9UK58-6; Q9UK58	1.38737	1.04722e-06
P48643	P48643	T-complex protein 1 subunit epsilon OS=Homo sapiens GN=CCT5 PE=1 SV=1	E9PCA1; B7ZAR1; P48643	1.36429	7.71756e-05
P48643	P48643	T-complex protein 1 subunit epsilon OS=Homo sapiens GN=CCT5 PE=1 SV=1	P48643-2; E9PCA1; E7ENZ3; B7ZAR1; P48643	1.35128	0.00197176
Q9Y5K6 1xPhospho [S458(100)]	Q9Y5K6	CD2-associated protein OS=Homo sapiens GN=CD2AP PE=1 SV=1	Q9Y5K6	1.38036	0.000590569
Q9UJX2 1xPhospho [T596(100)]	Q9UJX2	Cell division cycle protein 23 homolog OS=Homo sapiens GN=CDC23 PE=1 SV=3	Q9UJX2; Q9UJX2-3	1.4049	0.00134565
P06493 1xPhospho [Y/T]	P06493	Cyclin-dependent kinase 1 OS=Homo sapiens GN=CDK1 PE=1 SV=3	P06493; E5RIU6; A0A087WZZ9	2.46175	0.000189396
P06493 1xPhospho [Y15(100)]; G3V5T9 1xPhospho [Y15(100)]	P06493; G3V5T9	Cyclin-dependent kinase 1 OS=Homo sapiens GN=CDK1 PE=1 SV=3;Cyclin-dependent kinase 2 OS=Homo sapiens GN=CDK2 PE=1 SV=1	P24941; P06493; E7ESI2; Q00526; P24941-2; E5RIU6; G3V317; G3V5T9; A0A087WZZ9; P06493-2; K7ELV5; A0A024QZP7	1.68254	8.4954e-06
Q9NYV4-2 1xPhospho [Y/T/S]	Q9NYV4-2	Isoform 2 of Cyclin-dependent kinase 12 OS=Homo sapiens GN=CDK12	Q9NYV4-3; Q9NYV4-2; Q9NYV4; J3QSD7	1.87632	0.00344771
Q13112 1xPhospho [S410(99.4)]	Q13112	Chromatin assembly factor 1 subunit B OS=Homo sapiens GN=CHAF1B PE=1 SV=1	Q13112	1.36008	5.43924e-06
Q13112 1xPhospho [S/T]	Q13112	Chromatin assembly factor 1 subunit B OS=Homo sapiens GN=CHAF1B PE=1 SV=1	Q13112	1.60382	1.67841e-05
O14646 2xPhospho [S215(100); S216(100)]	O14646	Chromodomain-helicase-DNA-binding protein 1 OS=Homo sapiens GN=CHD1 PE=1 SV=2	O14646-2; O14646	1.36952	0.0245151
Q14839-2 1xPhospho [S428(100)]	Q14839-2	Isoform 2 of Chromodomain-helicase-DNA-binding protein 4 OS=Homo sapiens GN=CHD4	A0A0C4DGG9; Q14839-2; F5GWX5; Q14839	1.83535	0.00673366
Q14839-2 2xPhospho [T20(97.8)]	Q14839-2	Isoform 2 of Chromodomain-helicase-DNA-binding protein 4 OS=Homo sapiens GN=CHD4	A0A0C4DGG9; Q14839-2; F5GWX5; Q14839	1.37948	0.000718971
Q9HCK8 1xPhospho [S/T]	Q9HCK8	Chromodomain-helicase-DNA-binding protein 8 OS=Homo sapiens GN=CHD8 PE=1 SV=5	Q9HCK8; Q9HCK8-2	1.40515	0.0253808
O00299 1xPhospho [S156(99.6)]	O00299	Chloride intracellular channel protein 1 OS=Homo sapiens GN=CLIC1 PE=1 SV=4	O00299	2.76513	0.000112869
P54105 1xPhospho [S102(100)]	P54105	Methylosome subunit pICln OS=Homo sapiens GN=CLNS1A PE=1 SV=1	P54105; E9PJF4	1.4484	0.00708788
O75153 1xPhospho [S664(100)]	O75153	Clustered mitochondria protein homolog OS=Homo sapiens GN=CLUH PE=1 SV=2	K7EIG1; I3L2B0; O75153	1.36333	6.02641e-05
Q8N1G2 1xPhospho [S66(100)]	Q8N1G2	Cap-specific mRNA (nucleoside-2'-O-)-methyltransferase 1 OS=Homo sapiens GN=CMTR1 PE=1 SV=1	Q8N1G2; Q5T7F5	1.30852	0.041798
Q8N1G2 2xPhospho [S51(96.1); S53(96.1)]	Q8N1G2	Cap-specific mRNA (nucleoside-2'-O-)-methyltransferase 1 OS=Homo sapiens GN=CMTR1 PE=1 SV=1	Q8N1G2; Q5T7F5	1.35581	0.000113345
Q8N1G2 2xPhospho [S66(99.8); S]	Q8N1G2	Cap-specific mRNA (nucleoside-2'-O-)-methyltransferase 1 OS=Homo sapiens GN=CMTR1 PE=1 SV=1	Q8N1G2; Q5T7F5	1.78153	0.00376299
Q8WTW3 1xPhospho [S/T]	Q8WTW3	Conserved oligomeric Golgi complex subunit 1 OS=Homo sapiens GN=COG1 PE=1 SV=1	Q8WTW3; A0A087WVI0; E9PBL8	1.43049	0.00137322
Q96JB2 1xPhospho [S663(100)]	Q96JB2	Conserved oligomeric Golgi complex subunit 3 OS=Homo sapiens GN=COG3 PE=1 SV=3	Q96JB2	1.56002	0.00670977
P83436 1xPhospho [S506(100)]	P83436	Conserved oligomeric Golgi complex subunit 7 OS=Homo sapiens GN=COG7 PE=1 SV=1	P83436	1.51683	9.81725e-05
P53621-2 1xPhospho [S173(100)]	P53621-2	Isoform 2 of Coatomer subunit alpha OS=Homo sapiens GN=COPA	P53621-2; P53621	1.32517	0.000367371
P53621-2 1xPhospho [S904(100)]	P53621-2	Isoform 2 of Coatomer subunit alpha OS=Homo sapiens GN=COPA	P53621-2; P53621	1.31324	0.0111761
A0A087WUB9 1xPhospho [S550(100)]	A0A087WUB9	Beta-catenin-like protein 1 OS=Homo sapiens GN=CTNNBL1 PE=1 SV=1	Q8WYA6; A0A087WUB9; Q8WYA6-4; Q8WYA6-2; Q8WYA6-3	1.36122	1.24936e-06
Q13619 1xPhospho [S10(100)]	Q13619	Cullin-4A OS=Homo sapiens GN=CUL4A PE=1 SV=3	Q13619; A0A087WWN2	1.69249	0.000462696
P14868 1xPhospho [S249(100)]	P14868	Aspartate--tRNA ligase, cytoplasmic OS=Homo sapiens GN=DARS PE=1 SV=2	P14868; P14868-2	1.46631	0.00772346
Q9Y4B6 1xPhospho [S/T/Y]	Q9Y4B6	DDB1- and CUL4-associated factor 1 OS=Homo sapiens GN=DCAF1 PE=1 SV=3	Q9Y4B6; Q9Y4B6-3; Q9Y4B6-2	1.32668	0.000440942
Q9BTE7 1xPhospho [S9(100)]	Q9BTE7	DCN1-like protein 5 OS=Homo sapiens GN=DCUN1D5 PE=1 SV=1	E9PQV9; H0YD80; E9PLS2; E9PM78; E9PM04; E9PLH8; Q9BTE7	1.69301	7.20882e-06
Q5TDH0-3 1xPhospho [S121(99.5)]	Q5TDH0-3	Isoform 3 of Protein DDI1 homolog 2 OS=Homo sapiens GN=DDI2	Q5TDH0-3; Q5TDH0-2; Q5TDH0	1.32597	0.00587607
P35659 1xPhospho [S32(100)]	P35659	Protein DEK OS=Homo sapiens GN=DEK PE=1 SV=1	P35659-2; B4DFG0; D6R9L5; P35659	2.02782	0.0410771
P35659 2xPhospho [S306(100); S307(100)]	P35659	Protein DEK OS=Homo sapiens GN=DEK PE=1 SV=1	P35659-2; B4DFG0; H0Y993; P35659	4.65113	0.000109526
P35659 3xPhospho [S306(99.6); S307(99.6); S]	P35659	Protein DEK OS=Homo sapiens GN=DEK PE=1 SV=1	P35659-2; B4DFG0; H0Y993; P35659	4.30843	5.62106e-06
P35659 2xPhospho [S]	P35659	Protein DEK OS=Homo sapiens GN=DEK PE=1 SV=1	P35659-2; B4DFG0; H0Y993; P35659	6.45418	5.42004e-05
A0A0U1RR27 1xPhospho [S1059(100)]	A0A0U1RR27	C-myc promoter-binding protein OS=Homo sapiens GN=DENND4A PE=1 SV=1	Q7Z401; Q7Z401-2; A0A0U1RR27	1.36742	0.0195507
Q96QB1 1xPhospho [S566(100)]	Q96QB1	Rho GTPase-activating protein 7 OS=Homo sapiens GN=DLC1 PE=1 SV=4	Q96QB1-1; Q96QB1-4; Q96QB1; Q96QB1-6	1.30319	0.00817075
Q96QB1 2xPhospho [S523(100); S526(100)]	Q96QB1	Rho GTPase-activating protein 7 OS=Homo sapiens GN=DLC1 PE=1 SV=4	Q96QB1-1; Q96QB1-4; Q96QB1; Q96QB1-6	1.33349	0.000186451
Q9Y2H0 1xPhospho [T915(100)]	Q9Y2H0	Disks large-associated protein 4 OS=Homo sapiens GN=DLGAP4 PE=1 SV=3	Q9Y2H0-1; Q9Y2H0; Q9Y2H0-3; A0A0B4J2C2; F8WF49	1.32602	0.00485429
P25686 1xPhospho [S/Y/T]	P25686	DnaJ homolog subfamily B member 2 OS=Homo sapiens GN=DNAJB2 PE=1 SV=3	P25686-2; P25686; C9JXB9	1.3534	0.000570136
Q9UBS3 1xPhospho [S]	Q9UBS3	DnaJ homolog subfamily B member 9 OS=Homo sapiens GN=DNAJB9 PE=1 SV=1	Q9UBS3	5.91051	1.98234e-05
Q99543 1xPhospho [S47(100)]	Q99543	DnaJ homolog subfamily C member 2 OS=Homo sapiens GN=DNAJC2 PE=1 SV=4	Q99543; F2Z3H0; H7C3L7; Q99543-2; F2Z3N9	1.30052	0.00431866
Q99543 1xPhospho [S47(99.8)]	Q99543	DnaJ homolog subfamily C member 2 OS=Homo sapiens GN=DNAJC2 PE=1 SV=4	Q99543; F2Z3H0; H7C3L7; Q99543-2; F2Z3N9	1.38351	7.15813e-05
Q99543 2xPhospho [S60(100); S63(100)]	Q99543	DnaJ homolog subfamily C member 2 OS=Homo sapiens GN=DNAJC2 PE=1 SV=4	Q99543; F2Z3H0; H7C3L7; Q99543-2; F2Z3N9	1.34218	0.0075847
Q99543 2xPhospho [S60(100); S63(100)]	Q99543	DnaJ homolog subfamily C member 2 OS=Homo sapiens GN=DNAJC2 PE=1 SV=4	Q99543; F2Z3H0; H7C3L7; Q99543-2; F2Z3N9	1.33646	0.00015423
Q99543 1xPhospho [S]	Q99543	DnaJ homolog subfamily C member 2 OS=Homo sapiens GN=DNAJC2 PE=1 SV=4	Q99543; F2Z3H0; H7C3L7; Q99543-2; F2Z3N9	1.89441	0.00166196
Q99956 1xPhospho [S16(100)]	Q99956	Dual specificity protein phosphatase 9 OS=Homo sapiens GN=DUSP9 PE=1 SV=1	Q99956	1.33725	4.11296e-06
Q99956 1xPhospho [S328(100)]	Q99956	Dual specificity protein phosphatase 9 OS=Homo sapiens GN=DUSP9 PE=1 SV=1	Q16828; Q16829; Q99956; Q16829-2; F8VW29; Q16828-2	1.36359	0.001194
Q99956 1xPhospho [S328(99.7)]	Q99956	Dual specificity protein phosphatase 9 OS=Homo sapiens GN=DUSP9 PE=1 SV=1	Q16828; Q16829; Q99956; Q16829-2; F8VW29; Q16828-2	1.33718	0.000115191
Q9Y6G9 1xPhospho [S207(100)]	Q9Y6G9	Cytoplasmic dynein 1 light intermediate chain 1 OS=Homo sapiens GN=DYNC1LI1 PE=1 SV=3	C9JGM7; E9PHI6; Q9Y6G9	1.65865	4.04898e-06
Q9Y6G9 1xPhospho [S207(100)]	Q9Y6G9	Cytoplasmic dynein 1 light intermediate chain 1 OS=Homo sapiens GN=DYNC1LI1 PE=1 SV=3	C9JGM7; E9PHI6; Q9Y6G9	1.61662	0.000272122
Q9Y6G9 1xPhospho [S516(100)]	Q9Y6G9	Cytoplasmic dynein 1 light intermediate chain 1 OS=Homo sapiens GN=DYNC1LI1 PE=1 SV=3	E9PHI6; Q9Y6G9	1.93228	8.69758e-05
Q9Y6G9 2xPhospho [T513(99.6); S516(99.2)]	Q9Y6G9	Cytoplasmic dynein 1 light intermediate chain 1 OS=Homo sapiens GN=DYNC1LI1 PE=1 SV=3	E9PHI6; Q9Y6G9	2.11105	7.12964e-05
Q56P03 2xPhospho [S109(100); S111(100)]	Q56P03	E2F-associated phosphoprotein OS=Homo sapiens GN=EAPP PE=1 SV=4	A0A087X060; G3V2W9; Q56P03	1.39543	2.80684e-05
Q56P03 2xPhospho [S109(99.4); S111(100)]	Q56P03	E2F-associated phosphoprotein OS=Homo sapiens GN=EAPP PE=1 SV=4	A0A087X060; G3V2W9; Q56P03	1.319	0.00610914
P24534 1xPhospho [S106(100)]	P24534	Elongation factor 1-beta OS=Homo sapiens GN=EEF1B2 PE=1 SV=3	C9JZW3; P24534	1.34675	0.00757144
P13639 1xPhospho [T57(100)]	P13639	Elongation factor 2 OS=Homo sapiens GN=EEF2 PE=1 SV=4	P13639	1.64692	0.0175753
O00418 1xPhospho [S445(99.7)]	O00418	Eukaryotic elongation factor 2 kinase OS=Homo sapiens GN=EEF2K PE=1 SV=2	O00418	1.37511	0.00944363
O00418 3xPhospho [S470(99.4); S474(100); S477(99.4)]	O00418	Eukaryotic elongation factor 2 kinase OS=Homo sapiens GN=EEF2K PE=1 SV=2	O00418	1.69962	1.52958e-05
Q8NDI1 1xPhospho [S171(99.6)]	Q8NDI1	EH domain-binding protein 1 OS=Homo sapiens GN=EHBP1 PE=1 SV=3	Q8NDI1-2; B5MC86; C9K0H9; Q8NDI1-3; Q8NDI1	1.41616	0.0130448
Q13144 1xPhospho [S544(100)]	Q13144	Translation initiation factor eIF-2B subunit epsilon OS=Homo sapiens GN=EIF2B5 PE=1 SV=3	Q13144	1.37421	0.00179474
B5ME19 1xPhospho [S166(100)]	B5ME19	Eukaryotic translation initiation factor 3 subunit C-like protein OS=Homo sapiens GN=EIF3CL PE=3 SV=1	H3BPE3; Q99613-2; B5ME19; Q99613	1.61073	0.00141198
O15371 2xPhospho [T/S/Y]	O15371	Eukaryotic translation initiation factor 3 subunit D OS=Homo sapiens GN=EIF3D PE=1 SV=1	O15371-3; O15371; O15371-2	1.32658	0.0388303
E7EX17 1xPhospho [S464(98.2)]	E7EX17	Eukaryotic translation initiation factor 4B OS=Homo sapiens GN=EIF4B PE=1 SV=1	E7EX17; P23588; P23588-2	1.31176	0.0175265
P55010 1xPhospho [S229(99.7)]	P55010	Eukaryotic translation initiation factor 5 OS=Homo sapiens GN=EIF5 PE=1 SV=2	P55010	1.35733	0.0022528
P55010 1xPhospho [S/Y]	P55010	Eukaryotic translation initiation factor 5 OS=Homo sapiens GN=EIF5 PE=1 SV=2	P55010	1.89674	0.00036406
O60841 1xPhospho [S511(100)]	O60841	Eukaryotic translation initiation factor 5B OS=Homo sapiens GN=EIF5B PE=1 SV=4	O60841	1.30042	0.0093871
B5MBZ0 1xPhospho [S989(99.6)]	B5MBZ0	Echinoderm microtubule-associated protein-like 4 OS=Homo sapiens GN=EML4 PE=1 SV=3	Q9HC35; Q9HC35-2; B5MBZ0	1.42274	0.000129591
Q96L91 1xPhospho [S736(100)]	Q96L91	E1A-binding protein p400 OS=Homo sapiens GN=EP400 PE=1 SV=4	Q96L91-3; Q96L91-5; Q96L91; Q96L91-2; A0A0A0MR80; A0A0A0MR72; Q96L91-4	1.32222	0.000335845
Q9Y6I3-1 1xPhospho [T/S]	Q9Y6I3-1	Isoform 2 of Epsin-1 OS=Homo sapiens GN=EPN1	Q9Y6I3; Q9Y6I3-1; Q9Y6I3-3	1.30495	0.000555805
Q9UJM3 2xPhospho [T127(99.5); T131(100)]	Q9UJM3	ERBB receptor feedback inhibitor 1 OS=Homo sapiens GN=ERRFI1 PE=1 SV=1	Q9UJM3	1.45937	0.000137609
Q9H501 2xPhospho [Y/S/T]	Q9H501	ESF1 homolog OS=Homo sapiens GN=ESF1 PE=1 SV=1	Q9H501; A0A087WX71	1.37515	0.0260659
P49327 1xPhospho [S1411(99.4)]	P49327	Fatty acid synthase OS=Homo sapiens GN=FASN PE=1 SV=3	P49327; A0A0U1RQF0	1.43542	0.00129325
P49327 1xPhospho [S207(100)]	P49327	Fatty acid synthase OS=Homo sapiens GN=FASN PE=1 SV=3	P49327; A0A0U1RQF0	1.37847	5.24595e-05
P49327 1xPhospho [T2204(100)]	P49327	Fatty acid synthase OS=Homo sapiens GN=FASN PE=1 SV=3	P49327; A0A0U1RQF0	1.71123	0.000785365
P49327 2xPhospho [S2198(100); T2204(100)]	P49327	Fatty acid synthase OS=Homo sapiens GN=FASN PE=1 SV=3	P49327; A0A0U1RQF0	1.62236	0.00208467
P49327 1xPhospho [S/T/Y]	P49327	Fatty acid synthase OS=Homo sapiens GN=FASN PE=1 SV=3	P49327; A0A0U1RQF0	1.42141	0.000181409
Q96AC1-3 1xPhospho [S351(99.6)]	Q96AC1-3	Isoform 3 of Fermitin family homolog 2 OS=Homo sapiens GN=FERMT2	A0A0U1RRM8; Q96AC1-3; H0YJ34; Q96AC1; Q96AC1-2	1.32833	0.0152267
P02671 1xPhospho [S56(100)]	P02671	Fibrinogen alpha chain OS=Homo sapiens GN=FGA PE=1 SV=2	P02671; A0A087WUA0; P02671-2	5.74179	0.000168939
A0A0A0MT60 2xPhospho [S1139(100); S/T]	A0A0A0MT60	Peptidylprolyl isomerase (Fragment) OS=Homo sapiens GN=FKBP15 PE=1 SV=1	A0A0A0MT60; Q5T1M5-2; Q5T1M5	1.38015	0.000759292
P02751-15 1xPhospho [S2475(100)]	P02751-15	Isoform 15 of Fibronectin OS=Homo sapiens GN=FN1	P02751-3; P02751-14; P02751-7; P02751-12; P02751-9; P02751-10; P02751-5; P02751-17; P02751-15; P02751; P02751-6; P02751-13; P02751-8; P02751-11; H0Y7Z1	1.48482	0.00703995
P85037 2xPhospho [S213(100); S223(100)]	P85037	Forkhead box protein K1 OS=Homo sapiens GN=FOXK1 PE=1 SV=1	U3KQ26; P85037-2; P85037	1.30255	5.49348e-06
P85037 2xPhospho [S441(99.6); S445(99.6)]	P85037	Forkhead box protein K1 OS=Homo sapiens GN=FOXK1 PE=1 SV=1	P85037-2; P85037	1.30813	0.00345768
P02794 1xPhospho [S/Y/T]	P02794	Ferritin heavy chain OS=Homo sapiens GN=FTH1 PE=1 SV=2	G3V1D1; P02794; G3V192	1.84477	0.00286449
P02794 1xPhospho [T/S/Y]	P02794	Ferritin heavy chain OS=Homo sapiens GN=FTH1 PE=1 SV=2	G3V1D1; P02794; G3V192	1.72436	0.00994917
Q13283 2xPhospho [S/T]	Q13283	Ras GTPase-activating protein-binding protein 1 OS=Homo sapiens GN=G3BP1 PE=1 SV=1	Q13283	1.41956	0.0444897
Q13480-2 1xPhospho [S547(100)]	Q13480-2	Isoform 2 of GRB2-associated-binding protein 1 OS=Homo sapiens GN=GAB1	Q13480-2	1.34123	0.037589
P04406 1xPhospho [S/T]	P04406	Glyceraldehyde-3-phosphate dehydrogenase OS=Homo sapiens GN=GAPDH PE=1 SV=3	E7EUT5; P04406-2; P04406	1.4302	3.00479e-05
Q8WXI9 1xPhospho [S135(100)]	Q8WXI9	Transcriptional repressor p66-beta OS=Homo sapiens GN=GATAD2B PE=1 SV=1	Q8WXI9; A0A0U1RRK3; A0A0U1RR34; A0A0U1RRM1	1.36976	0.000832714
Q99988 1xPhospho [S219(100)]	Q99988	Growth/differentiation factor 15 OS=Homo sapiens GN=GDF15 PE=1 SV=3	Q99988	3.93653	0.000107782
Q9Y2X7-3 1xPhospho [S371(99.8)]	Q9Y2X7-3	Isoform 3 of ARF GTPase-activating protein GIT1 OS=Homo sapiens GN=GIT1	J3QRU8; A0A0C4DGN6; Q9Y2X7; Q9Y2X7-3	1.34625	9.85261e-05
Q14161 2xPhospho [S/T]	Q14161	ARF GTPase-activating protein GIT2 OS=Homo sapiens GN=GIT2 PE=1 SV=2	Q14161-11; R4GNG3; Q14161-5; Q14161-7; Q14161-9; Q14161-6; Q14161; Q14161-3; Q14161-2	1.48917	0.00014909
Q8TBA6 1xPhospho [S116(100)]	Q8TBA6	Golgin subfamily A member 5 OS=Homo sapiens GN=GOLGA5 PE=1 SV=3	Q8TBA6-2; Q8TBA6	1.38757	0.00139714
Q14451-3 1xPhospho [S/T]	Q14451-3	Isoform 3 of Growth factor receptor-bound protein 7 OS=Homo sapiens GN=GRB7	Q14451-3; Q14451-2; J3QL76; Q14451	1.33531	0.0019308
G3V1A6 1xPhospho [S/T]	G3V1A6	Gasdermin domain containing 1, isoform CRA_d OS=Homo sapiens GN=GSDMD PE=1 SV=1	P57764; G3V1A6	1.3021	2.96247e-05
Q12789 1xPhospho [S1611(100)]	Q12789	General transcription factor 3C polypeptide 1 OS=Homo sapiens GN=GTF3C1 PE=1 SV=4	Q12789-3; Q12789	1.40768	0.00181951
O00178 2xPhospho [S]	O00178	GTP-binding protein 1 OS=Homo sapiens GN=GTPBP1 PE=1 SV=3	O00178; F8WAZ4	1.45209	0.000103923
Q13547 2xPhospho [S421(100); S423(100)]	Q13547	Histone deacetylase 1 OS=Homo sapiens GN=HDAC1 PE=1 SV=1	Q13547	1.51212	0.00687696
P51858-3 1xPhospho [S181(100)]	P51858-3	Isoform 3 of Hepatoma-derived growth factor OS=Homo sapiens GN=HDGF	P51858-3; P51858-2; P51858	1.3415	0.00567955
Q7Z4V5-3 1xPhospho [S240(100)]; Q7Z4V5-4 1xPhospho [S240(100)]	Q7Z4V5-3; Q7Z4V5-4	Isoform 3 of Hepatoma-derived growth factor-related protein 2 OS=Homo sapiens GN=HDGFRP2;Isoform 4 of Hepatoma-derived growth factor-related protein 2 OS=Homo sapiens GN=HDGFRP2	Q7Z4V5-3; Q7Z4V5-2; A0A087WT54; Q7Z4V5-4; Q7Z4V5	1.56572	8.79543e-05
Q7Z4V5-3; Q7Z4V5-4 2xPhospho [S]	Q7Z4V5-3; Q7Z4V5-4	Isoform 3 of Hepatoma-derived growth factor-related protein 2 OS=Homo sapiens GN=HDGFRP2;Isoform 4 of Hepatoma-derived growth factor-related protein 2 OS=Homo sapiens GN=HDGFRP2	Q7Z4V5-3; Q7Z4V5-2; A0A087WT54; Q7Z4V5-4; Q7Z4V5	2.94295	1.39366e-06
A0A024R4E5 1xPhospho [S944(100)]	A0A024R4E5	High density lipoprotein binding protein (Vigilin), isoform CRA_a OS=Homo sapiens GN=HDLBP PE=1 SV=1	Q00341; A0A024R4E5; Q00341-2; H0Y394	1.46839	0.0059259
A0A140T913 1xPhospho [S362(100)]	A0A140T913	HLA class I histocompatibility antigen, A-3 alpha chain OS=Homo sapiens GN=HLA-A PE=1 SV=1	P05534; P01892; P01891; P30447; A0A140T913; A0A140T9X5; Q09160; A0A140T9I0; P10316	1.45392	0.00299309
A0A0G2JH50 1xPhospho [S363(99.5)]	A0A0G2JH50	HLA class I histocompatibility antigen, Cw-6 alpha chain OS=Homo sapiens GN=HLA-C PE=1 SV=1	Q95604; Q29960-2; Q29960; Q29963; Q29865; Q07000; P04222; A0A140T9M0; Q9TNN7; A0A140T912; P30505; P30510; A0A0G2JH50; P30504; A0A140T9J9; P30508	1.35623	0.00154163
Q9UGU5 2xPhospho [S512(100); S/T]	Q9UGU5	HMG domain-containing protein 4 OS=Homo sapiens GN=HMGXB4 PE=1 SV=2	Q9UGU5	1.33208	0.000125767
P41235-4 1xPhospho [S/Y]	P41235-4	Isoform HNF4-Alpha-4 of Hepatocyte nuclear factor 4-alpha OS=Homo sapiens GN=HNF4A	P41235-6; P41235-4; P41235; P41235-5; P41235-2; A0A087WXV4; P41235-3; P41235-7	1.48096	0.00258861
P07900-2 1xPhospho [S353(100)]	P07900-2	Isoform 2 of Heat shock protein HSP 90-alpha OS=Homo sapiens GN=HSP90AA1	P07900-2; P07900; G3V2J8	1.37084	0.0299122
Q14568 1xPhospho [S263(100)]	Q14568	Heat shock protein HSP 90-alpha A2 OS=Homo sapiens GN=HSP90AA2P PE=1 SV=2	Q14568	8.10332	6.09377e-05
P08238 1xPhospho [S226(100)]	P08238	Heat shock protein HSP 90-beta OS=Homo sapiens GN=HSP90AB1 PE=1 SV=4	P08238; Q58FF7	1.60923	0.000486755
P08238 1xPhospho [S226(100)]	P08238	Heat shock protein HSP 90-beta OS=Homo sapiens GN=HSP90AB1 PE=1 SV=4	P08238; Q58FF7	1.38013	0.00285883
Q58FF8 1xPhospho [S177(100)]	Q58FF8	Putative heat shock protein HSP 90-beta 2 OS=Homo sapiens GN=HSP90AB2P PE=1 SV=2	Q58FF8	1.38836	0.0280437
O43719 2xPhospho [S713(100); S714(100)]	O43719	HIV Tat-specific factor 1 OS=Homo sapiens GN=HTATSF1 PE=1 SV=1	O43719	1.31181	0.00634002
Q7Z6Z7 1xPhospho [S3919(100)]	Q7Z6Z7	E3 ubiquitin-protein ligase HUWE1 OS=Homo sapiens GN=HUWE1 PE=1 SV=3	H0Y659; Q7Z6Z7-2; Q7Z6Z7; Q7Z6Z7-3	1.40651	0.0153113
Q7Z6Z7 2xPhospho [T3924(100); T3927(100)]	Q7Z6Z7	E3 ubiquitin-protein ligase HUWE1 OS=Homo sapiens GN=HUWE1 PE=1 SV=3	H0Y659; Q7Z6Z7-2; Q7Z6Z7; Q7Z6Z7-3	1.97806	3.66646e-05
Q7Z6Z7 1xPhospho [T/S]	Q7Z6Z7	E3 ubiquitin-protein ligase HUWE1 OS=Homo sapiens GN=HUWE1 PE=1 SV=3	H0Y659; Q7Z6Z7-2; A0A087X146; Q7Z6Z7; Q7Z6Z7-3	1.31964	6.2447e-05
P01344-3 3xPhospho [S130(100); T/Y]	P01344-3	Isoform 3 of Insulin-like growth factor II OS=Homo sapiens GN=IGF2	P01344-2; P01344; P01344-3	2.39213	0.000104021
P08833 1xPhospho [S194(100)]	P08833	Insulin-like growth factor-binding protein 1 OS=Homo sapiens GN=IGFBP1 PE=1 SV=1	P08833; C9JXF9	2.1963	0.000213753
P40189 1xPhospho [S710(100)]	P40189	Interleukin-6 receptor subunit beta OS=Homo sapiens GN=IL6ST PE=1 SV=2	P40189; P40189-3	1.50382	0.000612795
Q27J81 2xPhospho [T20(98.7)	Q27J81	Inverted formin-2 OS=Homo sapiens GN=INF2 PE=1 SV=2	Q27J81-2; A0A0A0MQU1; Q27J81	1.60181	0.0187096
A0A1B0GW41 1xPhospho [T/S]	A0A1B0GW41	Inhibitor of growth protein 5 OS=Homo sapiens GN=ING5 PE=1 SV=1	A0A1B0GW41; Q8WYH8-2; Q8WYH8	1.41122	0.00391541
P01308	P01308	Insulin OS=Homo sapiens GN=INS PE=1 SV=1	P01308; A6XGL2	2.05684	0.0011441
Q13576 1xPhospho [S16(100)]	Q13576	Ras GTPase-activating-like protein IQGAP2 OS=Homo sapiens GN=IQGAP2 PE=1 SV=4	Q13576	1.71424	2.91916e-05
Q13576 1xPhospho [Y/S]	Q13576	Ras GTPase-activating-like protein IQGAP2 OS=Homo sapiens GN=IQGAP2 PE=1 SV=4	Q13576	1.48192	0.0100779
Q7Z5L9 3xPhospho [S455(100); S457(100); S460(100)]	Q7Z5L9	Interferon regulatory factor 2-binding protein 2 OS=Homo sapiens GN=IRF2BP2 PE=1 SV=2	Q7Z5L9-2; Q7Z5L9-3; Q7Z5L9	1.3947	0.00116686
P19823 1xPhospho [S60(100)]	P19823	Inter-alpha-trypsin inhibitor heavy chain H2 OS=Homo sapiens GN=ITIH2 PE=1 SV=2	P19823; Q5T987	7.36898	0.00040501
P19823 1xPhospho [S60(99.6)]	P19823	Inter-alpha-trypsin inhibitor heavy chain H2 OS=Homo sapiens GN=ITIH2 PE=1 SV=2	P19823; Q5T987	4.22884	7.61352e-05
Q9Y2K7 1xPhospho [S869(100)]	Q9Y2K7	Lysine-specific demethylase 2A OS=Homo sapiens GN=KDM2A PE=1 SV=3	Q9Y2K7-4; Q9Y2K7-5; Q9Y2K7-2; Q9Y2K7; I3VM54	1.33423	0.0329833
Q07866-6 1xPhospho [S162(100)]	Q07866-6	Isoform N of Kinesin light chain 1 OS=Homo sapiens GN=KLC1	G3V3H3; Q07866-10; Q07866-7; G3V5R9; E7EVH7; Q07866-3; G3V2E7; Q07866; Q07866-4; F8W6L3; Q07866-5; G5E9S8; Q07866-6; Q07866-9; Q07866-8; Q07866-2	1.67398	0.00232928
Q9H0B6 1xPhospho [S582(100)]	Q9H0B6	Kinesin light chain 2 OS=Homo sapiens GN=KLC2 PE=1 SV=1	Q9H0B6-2; A8MZ87; Q9H0B6	1.91525	0.00274835
Q9NSK0-3 1xPhospho [S537(99.8)]	Q9NSK0-3	Isoform 3 of Kinesin light chain 4 OS=Homo sapiens GN=KLC4	Q9NSK0; Q9NSK0-5; Q9NSK0-3	2.69018	0.000112525
P57682 1xPhospho [Y/S]	P57682	Krueppel-like factor 3 OS=Homo sapiens GN=KLF3 PE=1 SV=1	P57682-2; P57682	1.33322	0.0120221
Q8WVC0 2xPhospho [S162(100); S171(100)]	Q8WVC0	RNA polymerase-associated protein LEO1 OS=Homo sapiens GN=LEO1 PE=1 SV=1	Q8WVC0; Q8WVC0-2	1.48996	0.0159166
Q8WVC0 2xPhospho [S212(100); S220(100)]	Q8WVC0	RNA polymerase-associated protein LEO1 OS=Homo sapiens GN=LEO1 PE=1 SV=1	Q8WVC0; Q8WVC0-2	1.35589	0.0176669
Q8N1G4 1xPhospho [S/T]	Q8N1G4	Leucine-rich repeat-containing protein 47 OS=Homo sapiens GN=LRRC47 PE=1 SV=1	Q8N1G4	1.44914	0.0014989
Q9BXY0 2xPhospho [S229(100); S232(100)]	Q9BXY0	Protein MAK16 homolog OS=Homo sapiens GN=MAK16 PE=1 SV=2	Q9BXY0	1.40005	0.00420655
P45985-2 2xPhospho [T402(99.8); S/Y]	P45985-2	Isoform 2 of Dual specificity mitogen-activated protein kinase kinase 4 OS=Homo sapiens GN=MAP2K4	P45985; P45985-2	1.73833	9.63772e-05
Q9Y6R4 1xPhospho [S431(100)]	Q9Y6R4	Mitogen-activated protein kinase kinase kinase 4 OS=Homo sapiens GN=MAP3K4 PE=1 SV=2	F5H538; F5H4R1; Q9Y6R4-2; F5H1X6; J3KNB8; Q9Y6R4	1.33483	7.44569e-05
E7EVA0 1xPhospho [S653(100)]	E7EVA0	Microtubule-associated protein OS=Homo sapiens GN=MAP4 PE=1 SV=1	P27816; E7EVA0; P27816-6	1.35896	2.01539e-05
Q96T17-2 1xPhospho [S691(100)]	Q96T17-2	Isoform 2 of MAP7 domain-containing protein 2 OS=Homo sapiens GN=MAP7D2	Q96T17-2; Q96T17-5; Q96T17; Q96T17-4	1.3522	0.00992386
Q16659 1xPhospho [S189(100)]	Q16659	Mitogen-activated protein kinase 6 OS=Homo sapiens GN=MAPK6 PE=1 SV=1	Q16659	1.35988	0.00767005
P29966 1xPhospho [S101(100)]	P29966	Myristoylated alanine-rich C-kinase substrate OS=Homo sapiens GN=MARCKS PE=1 SV=4	P29966	1.30979	0.000192025
J3KNR0; E9PC69 1xPhospho [T/S/Y]	J3KNR0; E9PC69	Non-specific serine/threonine protein kinase OS=Homo sapiens GN=MARK3 PE=1 SV=2;Non-specific serine/threonine protein kinase OS=Homo sapiens GN=MARK2 PE=1 SV=3	J3KNR0; Q7KZI7-6; K7EN95; Q7KZI7-3; E9PC69; Q9P0L2; Q9P0L2-3; A0A087X0I6; Q7KZI7; Q7KZI7-15; P27448-2; Q7KZI7-11; Q7KZI7-2; Q7KZI7-5; A0A0A0MQR8; Q7KZI7-10; A0A0A0MT23; Q96L34; Q7KZI7-4; P27448; P27448-6; Q7KZI7-8; A0A0A0MSZ1; P27448-3; P27448-7; Q7KZI7-14; P27448-4; Q7KZI7-7; B4DIB3; Q7KZI7-13; Q7KZI7-9; Q9P0L2-2; Q7KZI7-12; Q96L34-2; Q7KZI7-16; E7ETY4; Q6IPE9	1.81097	0.00154069
A8MXP9 1xPhospho [S188(100)]	A8MXP9	Matrin-3 OS=Homo sapiens GN=MATR3 PE=1 SV=1	A8MXP9; D6REM6; D6R991; A0A0R4J2E8	1.4622	0.0088088
A8MXP9 1xPhospho [S814(100)]	A8MXP9	Matrin-3 OS=Homo sapiens GN=MATR3 PE=1 SV=1	A8MXP9; D6REM6; A0A0R4J2E8; Q68E03; B3KM87; P43243-2	1.37305	0.00889958
A8MXP9 2xPhospho [S596(100); S598(99.8)]	A8MXP9	Matrin-3 OS=Homo sapiens GN=MATR3 PE=1 SV=1	A8MXP9; D6REM6; A0A0R4J2E8; B3KM87; P43243-2	1.35466	0.0107062
A8MXP9 1xPhospho [S/T]	A8MXP9	Matrin-3 OS=Homo sapiens GN=MATR3 PE=1 SV=1	A8MXP9; D6REM6; A0A0R4J2E8; Q68E03; B3KM87; P43243-2	1.42958	0.00137012
P25205-2 3xPhospho [S713(100); S717(100); T719(100)]	P25205-2	Isoform 2 of DNA replication licensing factor MCM3 OS=Homo sapiens GN=MCM3	P25205; Q7Z6P5; J3KQ69; P25205-2	1.31028	0.00466288
P25205-2 1xPhospho [Y/S/T]	P25205-2	Isoform 2 of DNA replication licensing factor MCM3 OS=Homo sapiens GN=MCM3	P25205; J3KQ69; P25205-2	1.59649	0.00250663
Q8N108-12 1xPhospho [S/Y/T]	Q8N108-12	Isoform 2 of Mesoderm induction early response protein 1 OS=Homo sapiens GN=MIER1	Q8N108-16; Q8N108-13; Q8N108-14; Q8N108-15; Q8N108-12; Q8N108-19; Q8N108-18; Q8N108-17; Q8N108	1.36555	0.00167077
Q5T2T1 1xPhospho [S/Y]	Q5T2T1	MAGUK p55 subfamily member 7 OS=Homo sapiens GN=MPP7 PE=1 SV=1	Q5T2T1-2; U5GXS2; Q5T2T1; S4R337	1.61001	0.000102434
P52701 1xPhospho [S137(99.8)]	P52701	DNA mismatch repair protein Msh6 OS=Homo sapiens GN=MSH6 PE=1 SV=2	C9J8Y8; P52701-2; U3KQ72; F8WAX8; C9JH55; P52701; A0A087WWJ1; C9J7Y7	1.44106	1.04251e-05
P52701 1xPhospho [S227(100)]	P52701	DNA mismatch repair protein Msh6 OS=Homo sapiens GN=MSH6 PE=1 SV=2	P52701-2; P52701-3; P52701; A0A087WWJ1; C9J7Y7	1.86558	0.000612394
Q9C0I1 1xPhospho [S564(100)]	Q9C0I1	Myotubularin-related protein 12 OS=Homo sapiens GN=MTMR12 PE=1 SV=2	Q9C0I1-2; Q9C0I1; Q9C0I1-3	1.3689	0.0175689
Q92614 1xPhospho [S]	Q92614	Unconventional myosin-XVIIIa OS=Homo sapiens GN=MYO18A PE=1 SV=3	Q92614; Q92614-5; Q92614-2; A0A0D9SFK2; Q92614-4; Q92614-3	1.34421	0.00157645
P41227 2xPhospho [S205(100); S209(100)]	P41227	N-alpha-acetyltransferase 10 OS=Homo sapiens GN=NAA10 PE=1 SV=1	P41227; P41227-2	1.37306	0.00255997
Q15742 2xPhospho [S162(100); S]	Q15742	NGFI-A-binding protein 2 OS=Homo sapiens GN=NAB2 PE=1 SV=1	Q15742-3; Q15742-2; Q15742	1.46855	0.000183319
P49321-3 2xPhospho [T479(100); S482(100)]	P49321-3	Isoform 3 of Nuclear autoantigenic sperm protein OS=Homo sapiens GN=NASP	P49321-4; P49321; P49321-3	2.07026	0.014413
P49321-3 2xPhospho [T479(100); S482(100)]	P49321-3	Isoform 3 of Nuclear autoantigenic sperm protein OS=Homo sapiens GN=NASP	P49321-4; P49321; P49321-3	1.74197	0.0131682
P49321-3 2xPhospho [T479(99.2); S482(99.2)]	P49321-3	Isoform 3 of Nuclear autoantigenic sperm protein OS=Homo sapiens GN=NASP	P49321-4; P49321; P49321-3	1.39045	0.00275677
P49321-3	P49321-3	Isoform 3 of Nuclear autoantigenic sperm protein OS=Homo sapiens GN=NASP	P49321-4; P49321; P49321-2; P49321-3; H0YF33; E9PRH9; Q5T624; E9PI86	1.38287	0.0151906
Q9BPX3 1xPhospho [S674(100)]	Q9BPX3	Condensin complex subunit 3 OS=Homo sapiens GN=NCAPG PE=1 SV=1	H0Y9Z8; Q9BPX3	1.79153	3.31177e-05
Q9BPX3 2xPhospho [S973(100); S975(100)]	Q9BPX3	Condensin complex subunit 3 OS=Homo sapiens GN=NCAPG PE=1 SV=1	Q9BPX3	1.40961	0.000812686
Q09161 1xPhospho [S22(99.7)]	Q09161	Nuclear cap-binding protein subunit 1 OS=Homo sapiens GN=NCBP1 PE=1 SV=1	F2Z2T1; Q09161	1.60685	0.000180552
P19338 1xPhospho [S145(99)]	P19338	Nucleolin OS=Homo sapiens GN=NCL PE=1 SV=3	C9J1H7; C9JWL1; P19338	3.46609	0.00118666
P19338 1xPhospho [S206(100)]	P19338	Nucleolin OS=Homo sapiens GN=NCL PE=1 SV=3	P19338	1.38583	0.000406183
O75376 1xPhospho [S2120(100)]	O75376	Nuclear receptor corepressor 1 OS=Homo sapiens GN=NCOR1 PE=1 SV=2	E7EVK1; O75376; J3QKP0; O75376-2; A0A088AWL3; J3KS29	1.34072	1.569e-05
Q8TD19 2xPhospho [S]	Q8TD19	Serine/threonine-protein kinase Nek9 OS=Homo sapiens GN=NEK9 PE=1 SV=2	Q8TD19	1.45362	0.00243377
Q8NEJ9 1xPhospho [S]	Q8NEJ9	Neuroguidin OS=Homo sapiens GN=NGDN PE=1 SV=1	Q8NEJ9; G3V4G1; Q8NEJ9-2	1.3615	0.0172997
Q5SYE7 1xPhospho [S328(100)]	Q5SYE7	NHS-like protein 1 OS=Homo sapiens GN=NHSL1 PE=1 SV=2	Q5SYE7-2; Q5SYE7	1.33829	0.00289263
J3KPD9 1xPhospho [T94(100)]	J3KPD9	NME1-NME2 readthrough OS=Homo sapiens GN=NME1-NME2 PE=1 SV=1	P22392-2; P15531; O60361; J3KPD9; E7ERL0; P22392; Q32Q12; P15531-2	1.56318	0.000388781
Q9Y2X3 2xPhospho [S502(100); S514(100)]	Q9Y2X3	Nucleolar protein 58 OS=Homo sapiens GN=NOP58 PE=1 SV=1	Q9Y2X3	1.46702	0.00201402
Q6P988 1xPhospho [S81(100)]	Q6P988	Palmitoleoyl-protein carboxylesterase NOTUM OS=Homo sapiens GN=NOTUM PE=1 SV=2	Q6P988; C9JYG8	1.67877	0.000144831
Q9H1E3 1xPhospho [S113(100)]	Q9H1E3	Nuclear ubiquitous casein and cyclin-dependent kinase substrate 1 OS=Homo sapiens GN=NUCKS1 PE=1 SV=1	Q9H1E3; Q9H1E3-2	1.38806	0.0059752
Q9NZT2 1xPhospho [S315(100)]	Q9NZT2	Opioid growth factor receptor OS=Homo sapiens GN=OGFR PE=1 SV=3	Q9NZT2; A0A0A0MRN5; Q9NZT2-2	1.35148	0.00210835
P22059 1xPhospho [S193(99.8)]	P22059	Oxysterol-binding protein 1 OS=Homo sapiens GN=OSBP PE=1 SV=1	P22059	2.12324	0.0071051
Q9UQ80 1xPhospho [T/S]	Q9UQ80	Proliferation-associated protein 2G4 OS=Homo sapiens GN=PA2G4 PE=1 SV=3	Q9UQ80; Q9UQ80-2	1.39723	0.0186924
P22234-2 1xPhospho [S27(100)]	P22234-2	Isoform 2 of Multifunctional protein ADE2 OS=Homo sapiens GN=PAICS	E9PBS1; P22234; P22234-2	1.3818	0.00122542
Q9H4Z3 1xPhospho [S/T]	Q9H4Z3	Phosphorylated CTD-interacting factor 1 OS=Homo sapiens GN=PCIF1 PE=1 SV=1	Q9H4Z3	1.49383	0.0026329
Q8NBP7 1xPhospho [S688(100)]	Q8NBP7	Proprotein convertase subtilisin/kexin type 9 OS=Homo sapiens GN=PCSK9 PE=1 SV=3	Q8NBP7	8.48853	2.53602e-05
Q53EL6 1xPhospho [S457(100)]	Q53EL6	Programmed cell death protein 4 OS=Homo sapiens GN=PDCD4 PE=1 SV=2	Q53EL6-2; Q53EL6	1.3941	0.0323271
Q15084-2 1xPhospho [S480(100)]	Q15084-2	Isoform 2 of Protein disulfide-isomerase A6 OS=Homo sapiens GN=PDIA6	Q15084-2; Q15084-5; Q15084-3; Q15084-4; Q15084	1.33282	0.00312033
Q9NTI5 2xPhospho [S/Y/T]	Q9NTI5	Sister chromatid cohesion protein PDS5 homolog B OS=Homo sapiens GN=PDS5B PE=1 SV=1	A9IYQ1; Q9NTI5-2; Q9NTI5	1.71828	0.00137082
H3BND4 1xPhospho [S]	H3BND4	Pyridoxal-dependent decarboxylase domain-containing protein 1 OS=Homo sapiens GN=PDXDC1 PE=1 SV=1	H3BNL6; H3BU11; Q86XE2; Q6P996; H3BM88; H3BND4; H3BQ54; Q6P996-2; J3KNK7	1.59501	0.0147594
O00264 1xPhospho [S181(100)]	O00264	Membrane-associated progesterone receptor component 1 OS=Homo sapiens GN=PGRMC1 PE=1 SV=3	O00264-2; O00264	1.46715	0.000559284
O00264 1xPhospho [S57(100)]	O00264	Membrane-associated progesterone receptor component 1 OS=Homo sapiens GN=PGRMC1 PE=1 SV=3	O00264-2; O00264	1.73482	0.00112096
Q93100 2xPhospho [S/T]	Q93100	Phosphorylase b kinase regulatory subunit beta OS=Homo sapiens GN=PHKB PE=1 SV=3	I3L213; Q93100-2; Q93100; Q93100-3; Q93100-4	1.53567	0.000121651
P42356 1xPhospho [S/T]	P42356	Phosphatidylinositol 4-kinase alpha OS=Homo sapiens GN=PI4KA PE=1 SV=4	P42356	1.30343	0.00104244
Q16513 1xPhospho [T/S/Y]	Q16513	Serine/threonine-protein kinase N2 OS=Homo sapiens GN=PKN2 PE=1 SV=1	Q16513-2; Q16513-3; Q16513; Q16513-5; H0Y429; Q16513-4	4.94315	0.00156132
Q9H8W4 1xPhospho [S226(99.8)]	Q9H8W4	Pleckstrin homology domain-containing family F member 2 OS=Homo sapiens GN=PLEKHF2 PE=1 SV=1	Q9H8W4	1.39552	0.000497008
A1L390 2xPhospho [S1183(98.5); S/T]	A1L390	Pleckstrin homology domain-containing family G member 3 OS=Homo sapiens GN=PLEKHG3 PE=1 SV=1	G3V311; A1L390-2; A1L390-3; A1L390	1.31411	0.041794
O95602 1xPhospho [Y/S]	O95602	DNA-directed RNA polymerase I subunit RPA1 OS=Homo sapiens GN=POLR1A PE=1 SV=2	B9ZVN9; O95602	1.46047	0.016751
Q9BUI4 2xPhospho [S204(100); S205(100)]	Q9BUI4	DNA-directed RNA polymerase III subunit RPC3 OS=Homo sapiens GN=POLR3C PE=1 SV=1	E9PHH9; Q9BUI4	1.64956	0.000148403
Q9NVU0 1xPhospho [S162(100)]	Q9NVU0	DNA-directed RNA polymerase III subunit RPC5 OS=Homo sapiens GN=POLR3E PE=1 SV=1	A0A0C4DH01; Q9NVU0-4; Q9NVU0; Q9NVU0-5; Q9NVU0-2; Q9NVU0-3	1.32362	2.57323e-06
Q9NVU0 1xPhospho [S503(100)]	Q9NVU0	DNA-directed RNA polymerase III subunit RPC5 OS=Homo sapiens GN=POLR3E PE=1 SV=1	A0A0C4DH01; Q9NVU0-4; Q9NVU0; Q9NVU0-5; Q9NVU0-2; Q9NVU0-3	1.44362	0.0232046
O43741 1xPhospho [S108(100)]	O43741	5'-AMP-activated protein kinase subunit beta-2 OS=Homo sapiens GN=PRKAB2 PE=1 SV=1	O43741	1.36952	0.00631829
P13861 1xPhospho [S]	P13861	cAMP-dependent protein kinase type II-alpha regulatory subunit OS=Homo sapiens GN=PRKAR2A PE=1 SV=2	P13861-2; P13861	1.58598	0.0155087
P13861 1xPhospho [S]	P13861	cAMP-dependent protein kinase type II-alpha regulatory subunit OS=Homo sapiens GN=PRKAR2A PE=1 SV=2	P13861-2; P13861	1.43093	0.000311715
P17252 1xPhospho [T/Y]	P17252	Protein kinase C alpha type OS=Homo sapiens GN=PRKCA PE=1 SV=4	P05129-2; P05771; P05771-2; P17252; P05129	1.71154	0.00907877
P78527 1xPhospho [S2612(98.3)]	P78527	DNA-dependent protein kinase catalytic subunit OS=Homo sapiens GN=PRKDC PE=1 SV=3	P78527-2; P78527	1.38236	0.0295382
O75400 1xPhospho [S938(100)]	O75400	Pre-mRNA-processing factor 40 homolog A OS=Homo sapiens GN=PRPF40A PE=1 SV=2	O75400-2; O75400-3; O75400	1.85769	7.93338e-05
O75400 1xPhospho [T373(100)]	O75400	Pre-mRNA-processing factor 40 homolog A OS=Homo sapiens GN=PRPF40A PE=1 SV=2	O75400-2; F5H578; O75400-3; O75400	1.33442	0.00839159
O75400 2xPhospho [S938(100); T/S]	O75400	Pre-mRNA-processing factor 40 homolog A OS=Homo sapiens GN=PRPF40A PE=1 SV=2	O75400-2; O75400-3; O75400	1.48549	0.00157604
P48634 1xPhospho [S1386(99.6)]	P48634	Protein PRRC2A OS=Homo sapiens GN=PRRC2A PE=1 SV=3	P48634-2; P48634; P48634-3	1.38554	0.00192295
P28066 1xPhospho [T/S]	P28066	Proteasome subunit alpha type-5 OS=Homo sapiens GN=PSMA5 PE=1 SV=3	P28066	1.83523	0.000123251
P43686	P43686	26S protease regulatory subunit 6B OS=Homo sapiens GN=PSMC4 PE=1 SV=2	P43686-2; P43686	1.3097	0.00202583
A0A087WW66 1xPhospho [T273(99.6)]	A0A087WW66	26S proteasome non-ATPase regulatory subunit 1 OS=Homo sapiens GN=PSMD1 PE=1 SV=1	Q99460-2; Q99460; A0A087WW66; H7BZR6	1.99698	0.000129609
A0A087WYT3 2xPhospho [S152(100); S155(100)]	A0A087WYT3	Prostaglandin E synthase 3 OS=Homo sapiens GN=PTGES3 PE=1 SV=1	A0A087WYT3; B4DDC6; Q15185-2; Q15185	1.31543	0.025659
A0A087WYT3 1xPhospho [S]	A0A087WYT3	Prostaglandin E synthase 3 OS=Homo sapiens GN=PTGES3 PE=1 SV=1	A0A087WYT3; B4DDC6; Q15185-2; Q15185	1.93047	0.000849073
Q2KHR3 2xPhospho [T1341(100); S1348(100)]	Q2KHR3	Glutamine and serine-rich protein 1 OS=Homo sapiens GN=QSER1 PE=1 SV=3	Q2KHR3-2; Q2KHR3; H0YCQ7	1.46897	0.00107392
O60216 1xPhospho [S545(100)]	O60216	Double-strand-break repair protein rad21 homolog OS=Homo sapiens GN=RAD21 PE=1 SV=2	E5RI01; O60216; E5RFZ5	1.37166	0.0471862
Q99638 1xPhospho [S328(100)]	Q99638	Cell cycle checkpoint control protein RAD9A OS=Homo sapiens GN=RAD9A PE=1 SV=1	Q99638	1.66695	0.000910741
Q2PPJ7 2xPhospho [S820(99.8); S821(100)]	Q2PPJ7	Ral GTPase-activating protein subunit alpha-2 OS=Homo sapiens GN=RALGAPA2 PE=1 SV=2	Q2PPJ7; H7C1F9; Q2PPJ7-3; Q2PPJ7-2	1.3586	0.0049214
P46060 2xPhospho [S442(100); S/T]	P46060	Ran GTPase-activating protein 1 OS=Homo sapiens GN=RANGAP1 PE=1 SV=1	P46060	1.52083	0.0028484
P46060 1xPhospho [S/T]	P46060	Ran GTPase-activating protein 1 OS=Homo sapiens GN=RANGAP1 PE=1 SV=1	P46060	1.36579	6.37519e-05
Q08999 1xPhospho [S1068(100)]	Q08999	Retinoblastoma-like protein 2 OS=Homo sapiens GN=RBL2 PE=1 SV=3	Q08999; Q08999-2	1.41426	2.19747e-06
Q14498 1xPhospho [S136(100)]	Q14498	RNA-binding protein 39 OS=Homo sapiens GN=RBM39 PE=1 SV=2	G3XAC6; H0Y4X3; Q5QP22; Q14498-3; Q14498; Q5QP23; Q14498-2	1.37093	0.00212117
P52756 1xPhospho [S59(100)]	P52756	RNA-binding protein 5 OS=Homo sapiens GN=RBM5 PE=1 SV=2	F8W910; P52756; C9J9P7; C9JFQ5; P52756-5; P52756-2; P52756-4; C9JR02; P52756-3	1.38173	0.000600775
P18754-2 1xPhospho [S11(100)]	P18754-2	Isoform 2 of Regulator of chromosome condensation OS=Homo sapiens GN=RCC1	M0R1Q8; P18754; C9JQZ4; C9JRH2; C9JMJ4; P18754-2; C9JW69; C9J3R0	4.62157	0.00108007
Q9NPQ8-3 1xPhospho [S442(99.5)]	Q9NPQ8-3	Isoform 3 of Synembryn-A OS=Homo sapiens GN=RIC8A	H0YC88; Q9NPQ8-3; H0YE35; Q9NPQ8-4; Q9NPQ8-2; Q9NPQ8	1.46737	0.000646258
Q5UIP0 1xPhospho [S2393(100)]	Q5UIP0	Telomere-associated protein RIF1 OS=Homo sapiens GN=RIF1 PE=1 SV=2	Q5UIP0-2; H7C2B5; Q5UIP0	1.44566	0.000344737
Q5VTR2 1xPhospho [S138(100)]	Q5VTR2	E3 ubiquitin-protein ligase BRE1A OS=Homo sapiens GN=RNF20 PE=1 SV=2	Q5VTR2; C9J0A5; C9JXC9	1.40219	0.0174844
P05388 1xPhospho [S]	P05388	60S acidic ribosomal protein P0 OS=Homo sapiens GN=RPLP0 PE=1 SV=1	P05388; F8VWS0; F8W1K8; Q8NHW5; P05388-2	4.58255	0.000340393
P05388 1xPhospho [S]	P05388	60S acidic ribosomal protein P0 OS=Homo sapiens GN=RPLP0 PE=1 SV=1	P05388; F8VWS0; F8W1K8; Q8NHW5; P05388-2	3.27971	0.000116577
P05388 1xPhospho [S]	P05388	60S acidic ribosomal protein P0 OS=Homo sapiens GN=RPLP0 PE=1 SV=1	P05388; F8VWS0; F8W1K8; Q8NHW5; P05388-2	2.76008	0.00230791
P05387 1xPhospho [S102(99.5)]	P05387	60S acidic ribosomal protein P2 OS=Homo sapiens GN=RPLP2 PE=1 SV=1	P05386; P05386-2; P05387; H0YDD8	3.01964	0.000131704
P05387 1xPhospho [S105(99.5)]	P05387	60S acidic ribosomal protein P2 OS=Homo sapiens GN=RPLP2 PE=1 SV=1	P05386; P05386-2; P05387; H0YDD8	1.87381	0.00107989
P05387 1xPhospho [S105(99.8)]	P05387	60S acidic ribosomal protein P2 OS=Homo sapiens GN=RPLP2 PE=1 SV=1	P05386; P05386-2; P05387; H0YDD8	1.71488	7.16944e-05
Q5VT52 1xPhospho [S1099(100)]	Q5VT52	Regulation of nuclear pre-mRNA domain-containing protein 2 OS=Homo sapiens GN=RPRD2 PE=1 SV=1	Q5VT52; Q5VT52-2; Q5VT52-3	1.37214	0.000118003
P51812 1xPhospho [S369(100)]	P51812	Ribosomal protein S6 kinase alpha-3 OS=Homo sapiens GN=RPS6KA3 PE=1 SV=1	P51812	1.52531	0.000233334
P51812 1xPhospho [S415(100)]	P51812	Ribosomal protein S6 kinase alpha-3 OS=Homo sapiens GN=RPS6KA3 PE=1 SV=1	P51812	5.68535	0.00011842
P31350-2 1xPhospho [S80(100)]	P31350-2	Isoform 2 of Ribonucleoside-diphosphate reductase subunit M2 OS=Homo sapiens GN=RRM2	P31350-2; P31350	1.39927	0.0451464
Q9Y3B9 2xPhospho [S58(99.6); S67(100)]	Q9Y3B9	RRP15-like protein OS=Homo sapiens GN=RRP15 PE=1 SV=2	Q9Y3B9	1.45817	0.012795
O43818 1xPhospho [S53(99.6)]	O43818	U3 small nucleolar RNA-interacting protein 2 OS=Homo sapiens GN=RRP9 PE=1 SV=1	O43818	6.45456	0.000170359
Q96T23 1xPhospho [Y/S]	Q96T23	Remodeling and spacing factor 1 OS=Homo sapiens GN=RSF1 PE=1 SV=2	H0YCN2; Q96T23; Q96T23-3; Q96T23-2; H0YER1	2.04336	0.00010019
Q9BST9 1xPhospho [S561(100)]	Q9BST9	Rhotekin OS=Homo sapiens GN=RTKN PE=1 SV=2	Q9BST9-2; Q9BST9-3; Q9BST9	1.46801	3.05073e-05
Q9NQC3-2 1xPhospho [S/Y]	Q9NQC3-2	Isoform 2 of Reticulon-4 OS=Homo sapiens GN=RTN4	Q9NQC3-2; F8W914	2.21044	0.000729557
Q9NQC3-2 1xPhospho [S/Y]	Q9NQC3-2	Isoform 2 of Reticulon-4 OS=Homo sapiens GN=RTN4	Q9NQC3-2; F8W914	2.19331	0.00195227
E9PRZ1 1xPhospho [S/T]	E9PRZ1	Protein SAAL1 OS=Homo sapiens GN=SAAL1 PE=1 SV=1	E9PRZ1; E9PMD2; J3KND1; Q96ER3; H0YDM3; E9PL53	1.37031	0.0040877
A3KN83 1xPhospho [S]	A3KN83	Protein strawberry notch homolog 1 OS=Homo sapiens GN=SBNO1 PE=1 SV=1	A3KN83-3; A3KN83-2; A3KN83	2.71191	0.000181916
P57086 1xPhospho [S/T]	P57086	SCAN domain-containing protein 1 OS=Homo sapiens GN=SCAND1 PE=1 SV=1	P57086	1.44422	0.0137505
Q9BRK5 1xPhospho [T193(100)]	Q9BRK5	45 kDa calcium-binding protein OS=Homo sapiens GN=SDF4 PE=1 SV=1	Q9BRK5-6; Q9BRK5-2; Q9BRK5	1.54937	0.000149328
Q01105-2 1xPhospho [T/S]	Q01105-2	Isoform 2 of Protein SET OS=Homo sapiens GN=SET	Q01105-2	1.30535	0.0198064
O75533 1xPhospho [T227(100)]	O75533	Splicing factor 3B subunit 1 OS=Homo sapiens GN=SF3B1 PE=1 SV=3	O75533	2.23154	0.00010816
Q13435 2xPhospho [S431(99.5); S]	Q13435	Splicing factor 3B subunit 2 OS=Homo sapiens GN=SF3B2 PE=1 SV=2	E9PPJ0; Q13435	3.69972	4.09627e-05
H0Y4E8 1xPhospho [T/S/Y]	H0Y4E8	Serine/threonine-protein kinase SIK3 (Fragment) OS=Homo sapiens GN=SIK3 PE=1 SV=1	H0Y4E8; J3KPC8; H0Y494; Q9Y2K2; Q9Y2K2-3; Q9Y2K2-4; H7C3X8	2.80268	0.00125296
Q96ST3 1xPhospho [S832(100)]	Q96ST3	Paired amphipathic helix protein Sin3a OS=Homo sapiens GN=SIN3A PE=1 SV=2	Q96ST3	1.4051	0.00303878
O43166 1xPhospho [S]	O43166	Signal-induced proliferation-associated 1-like protein 1 OS=Homo sapiens GN=SIPA1L1 PE=1 SV=4	O43166; O43166-2; O43166-3	1.31533	0.00181172
Q8WUM9 2xPhospho [S265(100); S269(100)]	Q8WUM9	Sodium-dependent phosphate transporter 1 OS=Homo sapiens GN=SLC20A1 PE=1 SV=1	Q8WUM9	1.47076	0.000614856
Q96QD8 1xPhospho [S/Y]	Q96QD8	Sodium-coupled neutral amino acid transporter 2 OS=Homo sapiens GN=SLC38A2 PE=1 SV=2	Q96QD8; F8VUY8	1.36442	0.000166368
A0A0A0MT49 1xPhospho [S1486(100)]	A0A0A0MT49	Transcription activator BRG1 OS=Homo sapiens GN=SMARCA4 PE=1 SV=1	P51532; A0A0A0MT49; P51532-5; P51532-2; Q9HBD4; P51532-4; P51532-3	1.3018	0.00250445
Q92922 2xPhospho [S328(100); S330(100)]	Q92922	SWI/SNF complex subunit SMARCC1 OS=Homo sapiens GN=SMARCC1 PE=1 SV=3	Q92922	1.36139	0.000902029
Q9UQE7 3xPhospho [S/Y]	Q9UQE7	Structural maintenance of chromosomes protein 3 OS=Homo sapiens GN=SMC3 PE=1 SV=2	Q9UQE7	1.3548	0.00825703
Q9NTJ3 1xPhospho [T/S]	Q9NTJ3	Structural maintenance of chromosomes protein 4 OS=Homo sapiens GN=SMC4 PE=1 SV=2	Q9NTJ3; C9IYK2; C9JR83; Q9NTJ3-2; C9JWF0; C9JJ64	1.3702	0.000464909
Q7KZF4 1xPhospho [S426(99.3)]	Q7KZF4	Staphylococcal nuclease domain-containing protein 1 OS=Homo sapiens GN=SND1 PE=1 SV=1	Q7KZF4	1.68117	0.000269177
Q13596-3 1xPhospho [S188(100)]	Q13596-3	Isoform 3 of Sorting nexin-1 OS=Homo sapiens GN=SNX1	Q13596; Q13596-2; Q13596-3	2.95708	2.74136e-06
A0A087X0R6 1xPhospho [Y/S]	A0A087X0R6	Sorting nexin-12 OS=Homo sapiens GN=SNX12 PE=1 SV=1	A0A087X0R6; Q9UMY4; Q9UMY4-2; Q9UMY4-3	1.30906	0.000492762
Q9NRS6 1xPhospho [S/T]	Q9NRS6	Sorting nexin-15 OS=Homo sapiens GN=SNX15 PE=1 SV=1	Q9NRS6; E9PMW6; E9PK26; Q9NRS6-2	1.55351	0.00228172
A0A0D9SGF6 1xPhospho [S1217(100)]	A0A0D9SGF6	Spectrin alpha chain, non-erythrocytic 1 OS=Homo sapiens GN=SPTAN1 PE=1 SV=1	Q13813-3; A0A0D9SF54; A0A0D9SGF6; Q13813; Q13813-2	1.66998	0.00390123
A0A087WUZ3 1xPhospho [S2104(100)]; Q01082-3 1xPhospho [S2089(100)]	A0A087WUZ3; Q01082-3	Spectrin beta chain OS=Homo sapiens GN=SPTBN1 PE=1 SV=1;Isoform 2 of Spectrin beta chain, non-erythrocytic 1 OS=Homo sapiens GN=SPTBN1	Q01082-2; Q01082; A0A087WUZ3; Q01082-3	1.87097	0.002067
Q96SB4-3 1xPhospho [S482(99.7)]	Q96SB4-3	Isoform 1 of SRSF protein kinase 1 OS=Homo sapiens GN=SRPK1	D6RBF8; Q96SB4-4; H3BLV9; Q96SB4-3; Q96SB4	1.31614	0.0056741
M0R088 1xPhospho [S422(99.8)]; A9Z1X7 1xPhospho [S458(99.8)]	M0R088; A9Z1X7	Serine/arginine repetitive matrix protein 1 (Fragment) OS=Homo sapiens GN=SRRM1 PE=1 SV=1;Serine/arginine repetitive matrix protein 1 OS=Homo sapiens GN=SRRM1 PE=1 SV=1	Q8IYB3; E9PCT1; M0R088; A9Z1X7; Q8IYB3-2	1.41468	0.00455969
M0R088 1xPhospho [S626(100)]; A9Z1X7 1xPhospho [S662(100)]	M0R088; A9Z1X7	Serine/arginine repetitive matrix protein 1 (Fragment) OS=Homo sapiens GN=SRRM1 PE=1 SV=1;Serine/arginine repetitive matrix protein 1 OS=Homo sapiens GN=SRRM1 PE=1 SV=1	Q8IYB3; E9PCT1; M0R088; A9Z1X7; Q8IYB3-2	4.66502	0.00126042
M0R088 2xPhospho [S422(100); S424(100)]; A9Z1X7 2xPhospho [S458(100); S460(100)]	M0R088; A9Z1X7	Serine/arginine repetitive matrix protein 1 (Fragment) OS=Homo sapiens GN=SRRM1 PE=1 SV=1;Serine/arginine repetitive matrix protein 1 OS=Homo sapiens GN=SRRM1 PE=1 SV=1	Q8IYB3; E9PCT1; M0R088; A9Z1X7; Q8IYB3-2	1.62464	0.0154986
Q9UQ35 1xPhospho [S954(100)]	Q9UQ35	Serine/arginine repetitive matrix protein 2 OS=Homo sapiens GN=SRRM2 PE=1 SV=2	I3L182; Q9UQ35; Q9UQ35-2; I3L4D8	1.34856	0.000176789
Q9BXP5 1xPhospho [T544(100)]	Q9BXP5	Serrate RNA effector molecule homolog OS=Homo sapiens GN=SRRT PE=1 SV=1	Q9BXP5-4; Q9BXP5-5; Q9BXP5-3; H7C3A1; Q9BXP5; Q9BXP5-2	1.43322	3.57183e-05
Q01130	Q01130	Serine/arginine-rich splicing factor 2 OS=Homo sapiens GN=SRSF2 PE=1 SV=4	Q01130-2; Q01130	1.3401	0.0297267
P53999 1xPhospho [S]	P53999	Activated RNA polymerase II transcriptional coactivator p15 OS=Homo sapiens GN=SUB1 PE=1 SV=3	D6RC37; D6R970; P53999	1.46225	0.00059032
Q9H7L9 3xPhospho [S45(100); T49(100); S53(99.5)]	Q9H7L9	Sin3 histone deacetylase corepressor complex component SDS3 OS=Homo sapiens GN=SUDS3 PE=1 SV=2	Q9H7L9	1.42461	0.000793264
Q8IWU5 1xPhospho [S838(99.8)]	Q8IWU5	Extracellular sulfatase Sulf-2 OS=Homo sapiens GN=SULF2 PE=1 SV=1	H0Y872; Q8IWU5	1.31639	0.000331516
A0A0A6YYL2	A0A0A6YYL2	Sulfotransferase OS=Homo sapiens GN=SULT1A4 PE=1 SV=1	P0DMN0; E9PKR8; P50225; A0A0A6YYL2; E9PKW4; H3BRY5; E9PM76; P50226; P0DMM9-2; H3BNY7	1.39529	0.0463286
Q8TAQ9 1xPhospho [S]	Q8TAQ9	SUN domain-containing protein 3 OS=Homo sapiens GN=SUN3 PE=1 SV=4	Q8TAQ9-2; Q8TAQ9; H7C2N0; A0A0A0MSG9; Q8TAQ9-3; H7BZA7	1.41304	0.011018
Q9Y5B9 1xPhospho [S982(100)]	Q9Y5B9	FACT complex subunit SPT16 OS=Homo sapiens GN=SUPT16H PE=1 SV=1	Q9Y5B9	9.90084	5.6683e-05
Q9UMZ2 1xPhospho [S1075(100)]	Q9UMZ2	Synergin gamma OS=Homo sapiens GN=SYNRG PE=1 SV=2	Q9UMZ2-7; Q9UMZ2-8; Q9UMZ2; Q9UMZ2-3; Q9UMZ2-9; Q9UMZ2-6; Q9UMZ2-5; Q9UMZ2-4	1.57202	0.00045426
Q8TC07-3 1xPhospho [S/Y]	Q8TC07-3	Isoform 3 of TBC1 domain family member 15 OS=Homo sapiens GN=TBC1D15	Q8TC07-3; C9JA93; Q8TC07-2	1.37616	0.000115681
O75764 1xPhospho [S115(100)]	O75764	Transcription elongation factor A protein 3 OS=Homo sapiens GN=TCEA3 PE=1 SV=2	S4R419; O75764-2; O75764	4.37243	6.83432e-05
Q9NXG2 2xPhospho [S86(100); S88(100)]	Q9NXG2	THUMP domain-containing protein 1 OS=Homo sapiens GN=THUMPD1 PE=1 SV=2	H3BNW0; Q9NXG2	1.35014	0.0151844
A0A1B0GTW1 1xPhospho [S457(99.1)]	A0A1B0GTW1	Tight junction protein ZO-2 OS=Homo sapiens GN=TJP2 PE=1 SV=1	Q9UDY2; A0A1B0GTW1; Q9UDY2-5; Q9UDY2-2; Q9UDY2-3; Q9UDY2-7; Q9UDY2-6; Q9UDY2-4	1.72472	0.00220272
A0A1B0GTW1 1xPhospho [S474(100)]	A0A1B0GTW1	Tight junction protein ZO-2 OS=Homo sapiens GN=TJP2 PE=1 SV=1	Q9UDY2; A0A1B0GTW1; Q9UDY2-5; Q9UDY2-2; Q9UDY2-3; Q9UDY2-7; Q9UDY2-6; Q9UDY2-4	1.42258	0.000165832
O75509 1xPhospho [S541(100)]	O75509	Tumor necrosis factor receptor superfamily member 21 OS=Homo sapiens GN=TNFRSF21 PE=1 SV=1	O75509	1.4241	0.00147182
P60174 1xPhospho [S58(100)]	P60174	Triosephosphate isomerase OS=Homo sapiens GN=TPI1 PE=1 SV=3	P60174-1; P60174	1.51704	0.00462271
Q13595 1xPhospho [S260(100)]; P62995 1xPhospho [S264(100)]	Q13595; P62995	Transformer-2 protein homolog alpha OS=Homo sapiens GN=TRA2A PE=1 SV=1;Transformer-2 protein homolog beta OS=Homo sapiens GN=TRA2B PE=1 SV=1	H7C2L4; H7BXF3; P62995-3; Q13595-3; Q13595; Q13595-4; P62995	1.67153	0.00141934
Q13595 2xPhospho [S260(100); S262(100)]; P62995 2xPhospho [S264(100); S266(100)]	Q13595; P62995	Transformer-2 protein homolog alpha OS=Homo sapiens GN=TRA2A PE=1 SV=1;Transformer-2 protein homolog beta OS=Homo sapiens GN=TRA2B PE=1 SV=1	H7C2L4; H7BXF3; P62995-3; Q13595-3; Q13595; Q13595-4; P62995	1.37036	0.022121
Q9BUZ4 1xPhospho [S426(99.6)]	Q9BUZ4	TNF receptor-associated factor 4 OS=Homo sapiens GN=TRAF4 PE=1 SV=1	Q9BUZ4; Q2KJU6	1.35965	9.68996e-06
O15164 1xPhospho [S110(98.1)]	O15164	Transcription intermediary factor 1-alpha OS=Homo sapiens GN=TRIM24 PE=1 SV=3	O15164-2; O15164	1.32014	0.00189132
Q13263 1xPhospho [T541(100)]	Q13263	Transcription intermediary factor 1-beta OS=Homo sapiens GN=TRIM28 PE=1 SV=5	Q13263; M0R0K9; Q13263-2	1.34824	0.00273845
Q9UPN9 1xPhospho [T/S]	Q9UPN9	E3 ubiquitin-protein ligase TRIM33 OS=Homo sapiens GN=TRIM33 PE=1 SV=3	Q9UPN9; H0Y612; Q9UPN9-2	2.1075	0.0001574
Q8WWH5 1xPhospho [T/S]	Q8WWH5	Probable tRNA pseudouridine synthase 1 OS=Homo sapiens GN=TRUB1 PE=1 SV=1	Q8WWH5	1.40769	0.00220578
A0A087WT59 1xPhospho [T/S/Y]	A0A087WT59	Transthyretin OS=Homo sapiens GN=TTR PE=1 SV=1	A0A087WV45; P02766; A0A087WT59	1.77421	6.1785e-05
P68363 1xPhospho [S439(100)]	P68363	Tubulin alpha-1B chain OS=Homo sapiens GN=TUBA1B PE=1 SV=1	Q71U36; P68363; Q71U36-2; P68363-2	1.72072	0.0011045
F5H5D3 1xPhospho [S509(100)]	F5H5D3	Tubulin alpha chain OS=Homo sapiens GN=TUBA1C PE=1 SV=1	F5H5D3; Q9BQE3	1.36049	0.000299178
F5H5D3 1xPhospho [S118(100)]; P68363 1xPhospho [S48(100)]	F5H5D3; P68363	Tubulin alpha chain OS=Homo sapiens GN=TUBA1C PE=1 SV=1;Tubulin alpha-1B chain OS=Homo sapiens GN=TUBA1B PE=1 SV=1	Q13748; F5H5D3; F8VXZ7; F8VRZ4; F8VRK0; F8VS66; F8VQQ4; Q6PEY2; Q13748-2; Q71U36; P68363; Q71U36-2; F8VWV9; F8W0F6; Q9BQE3; P68363-2; F8VVB9; F8VX09	1.40271	0.00213369
Q96CW5 1xPhospho [S/T]	Q96CW5	Gamma-tubulin complex component 3 OS=Homo sapiens GN=TUBGCP3 PE=1 SV=2	Q96CW5-2; Q96CW5	1.36926	0.00561344
Q9C0C9 1xPhospho [S515(100)]	Q9C0C9	(E3-independent) E2 ubiquitin-conjugating enzyme OS=Homo sapiens GN=UBE2O PE=1 SV=3	K7ES11; Q9C0C9	1.71108	0.00998515
Q9C0C9 2xPhospho [S87(100); S89(100)]	Q9C0C9	(E3-independent) E2 ubiquitin-conjugating enzyme OS=Homo sapiens GN=UBE2O PE=1 SV=3	Q9C0C9	1.35865	1.86473e-07
Q9C0C9 1xPhospho [T/S]	Q9C0C9	(E3-independent) E2 ubiquitin-conjugating enzyme OS=Homo sapiens GN=UBE2O PE=1 SV=3	K7ES11; Q9C0C9	1.48102	5.84025e-06
Q5T4S7-2 1xPhospho [T/S/Y]	Q5T4S7-2	Isoform 2 of E3 ubiquitin-protein ligase UBR4 OS=Homo sapiens GN=UBR4	Q5T4S7-5; Q5T4S7-3; Q5T4S7-2; Q5T4S7; Q5T4S7-4	1.42645	7.34639e-05
O95071 1xPhospho [S1549(99.7)]	O95071	E3 ubiquitin-protein ligase UBR5 OS=Homo sapiens GN=UBR5 PE=1 SV=2	O95071-2; O95071; E7EMW7	1.40203	1.64558e-05
O94874 1xPhospho [S458(100)]	O94874	E3 UFM1-protein ligase 1 OS=Homo sapiens GN=UFL1 PE=1 SV=2	O94874; O94874-3; O94874-2	1.4667	0.0295171
A0JNW5 1xPhospho [S/T]	A0JNW5	UHRF1-binding protein 1-like OS=Homo sapiens GN=UHRF1BP1L PE=1 SV=2	A0JNW5; A0A0C4DGH6; H0YHT7	1.35346	0.00404078
Q9Y5T5 1xPhospho [S552(99.7)]	Q9Y5T5	Ubiquitin carboxyl-terminal hydrolase 16 OS=Homo sapiens GN=USP16 PE=1 SV=1	Q9Y5T5-2; Q9Y5T5-3; Q9Y5T5-4; Q9Y5T5	1.3893	0.000916555
Q8NFA0 2xPhospho [S1361(99.5); S1372(100)]	Q8NFA0	Ubiquitin carboxyl-terminal hydrolase 32 OS=Homo sapiens GN=USP32 PE=1 SV=1	K7EQL6; Q8NFA0	1.40568	0.0109611
Q70CQ2 1xPhospho [S2488(99.3)]	Q70CQ2	Ubiquitin carboxyl-terminal hydrolase 34 OS=Homo sapiens GN=USP34 PE=1 SV=2	H7C183; Q70CQ2; Q70CQ2-3; Q70CQ2-2; A0A0C4DG73	1.55573	0.00397215
Q13107 2xPhospho [S675(99.6); S680(100)]	Q13107	Ubiquitin carboxyl-terminal hydrolase 4 OS=Homo sapiens GN=USP4 PE=1 SV=3	Q13107-2; H7C189; Q13107	1.45216	0.00551767
P45974 1xPhospho [T623(100)]	P45974	Ubiquitin carboxyl-terminal hydrolase 5 OS=Homo sapiens GN=USP5 PE=1 SV=2	P45974; P45974-2	1.3001	0.0126322
Q93008 1xPhospho [S1600(100)]	Q93008	Probable ubiquitin carboxyl-terminal hydrolase FAF-X OS=Homo sapiens GN=USP9X PE=1 SV=3	Q93008-1; Q93008	1.40501	0.00904457
Q93008 2xPhospho [S1593(99.7); S1600(100)]	Q93008	Probable ubiquitin carboxyl-terminal hydrolase FAF-X OS=Homo sapiens GN=USP9X PE=1 SV=3	Q93008-1; Q93008	1.30138	0.003923
O75691 1xPhospho [S2601(100)]	O75691	Small subunit processome component 20 homolog OS=Homo sapiens GN=UTP20 PE=1 SV=3	O75691	1.37864	0.000485764
Q96JG6 2xPhospho [S559(99.7); S561(99.7)]	Q96JG6	Syndetin OS=Homo sapiens GN=VPS50 PE=1 SV=3	Q96JG6-3; H0Y7Q2; Q96JG6	1.31358	0.0094005
O14980	O14980	Exportin-1 OS=Homo sapiens GN=XPO1 PE=1 SV=1	O14980	1.31511	0.000570853
P18887 2xPhospho [T453(100); S/T]	P18887	DNA repair protein XRCC1 OS=Homo sapiens GN=XRCC1 PE=1 SV=2	P18887; F5H8D7	1.33218	7.19294e-05
P16989 1xPhospho [S34(100)]	P16989	Y-box-binding protein 3 OS=Homo sapiens GN=YBX3 PE=1 SV=4	P16989-3; P16989; P16989-2	1.52785	0.00314687
J3QR07 1xPhospho [S308(100)]	J3QR07	YTH domain-containing protein 1 OS=Homo sapiens GN=YTHDC1 PE=1 SV=1	J3QR07; Q96MU7; Q96MU7-2	1.30892	0.0011806
O75152 1xPhospho [S108(100)]	O75152	Zinc finger CCCH domain-containing protein 11A OS=Homo sapiens GN=ZC3H11A PE=1 SV=3	E9PBY7; E9PQ61; O75152	1.45051	0.000161271
Q5T200 3xPhospho [S316(100); S325(99.4); T/S]	Q5T200	Zinc finger CCCH domain-containing protein 13 OS=Homo sapiens GN=ZC3H13 PE=1 SV=1	Q5T200; Q5T200-2	1.36355	0.0176653
E7ERS3 1xPhospho [S917(100)]	E7ERS3	Zinc finger CCCH domain-containing protein 18 OS=Homo sapiens GN=ZC3H18 PE=1 SV=1	Q86VM9; H3BRH3; E7ERS3	1.89948	0.00504566
P42224 1xPhospho [S727(100)]	P42224	Signal transducer and activator of transcription 1-alpha/beta OS=Homo sapiens GN=STAT1 PE=1 SV=2	P42224; H7BZ88	1.30494	0.000179669

## Sheet: Down-regulated
Modifications in Master Proteins	Master Protein Accessions	Master Protein Descriptions	Protein Accessions	HBV/mock	p-value
A0A087WUZ3 2xPhospho [S/T]	A0A087WUZ3	Spectrin beta chain OS=Homo sapiens GN=SPTBN1 PE=1 SV=1	Q01082; A0A087WUZ3	0.721242	0.0349055
A0A087WUZ3 1xPhospho [S2104(100)]; Q01082-3 1xPhospho [S2089(100)]	A0A087WUZ3; Q01082-3	Spectrin beta chain OS=Homo sapiens GN=SPTBN1 PE=1 SV=1;Isoform 2 of Spectrin beta chain, non-erythrocytic 1 OS=Homo sapiens GN=SPTBN1	Q01082-2; Q01082; A0A087WUZ3; Q01082-3	0.49177	0.000941674
A0A087WWI0 1xPhospho [S181(99.8)]	A0A087WWI0	Leucine-rich repeat-containing protein C10orf11 OS=Homo sapiens GN=C10orf11 PE=1 SV=1	A0A087WWI0; Q9H2I8	0.720974	2.5532e-05
A0A087WWI0 2xPhospho [S180(95.1); S181(95.1)]	A0A087WWI0	Leucine-rich repeat-containing protein C10orf11 OS=Homo sapiens GN=C10orf11 PE=1 SV=1	A0A087WWI0; Q9H2I8	0.738651	0.000981497
A0A087WYT3 1xPhospho [S117(99.4)]	A0A087WYT3	Prostaglandin E synthase 3 OS=Homo sapiens GN=PTGES3 PE=1 SV=1	Q15185-4; A0A087WYT3; B4DDC6; Q15185	0.594011	8.39335e-05
A0A087WYT3 1xPhospho [S117(100)]	A0A087WYT3	Prostaglandin E synthase 3 OS=Homo sapiens GN=PTGES3 PE=1 SV=1	Q15185-4; A0A087WYT3; B4DDC6; Q15185	0.620771	0.00553589
A0A0J9YX62 1xPhospho [S277(100)]	A0A0J9YX62	DnaJ homolog subfamily B member 6 OS=Homo sapiens GN=DNAJB6 PE=1 SV=1	E9PH18; A0A0J9YX62; O75190; O75190-4; O75190-3	0.743613	0.0140358
A0A1B0GTU4 1xPhospho [T/S]	A0A1B0GTU4	Paxillin OS=Homo sapiens GN=PXN PE=1 SV=1	P49023-2; P49023-4; F5GZ78; P49023; P49023-3; A0A1B0GTU4	0.582461	0.0137374
A0A1B0GV68 2xPhospho [S/T/Y]	A0A1B0GV68	FERM, RhoGEF and pleckstrin domain-containing protein 1 OS=Homo sapiens GN=FARP1 PE=1 SV=1	A0A1B0GV68	0.624126	0.00629921
A0A1B0GV68 1xPhospho [S/T]	A0A1B0GV68	FERM, RhoGEF and pleckstrin domain-containing protein 1 OS=Homo sapiens GN=FARP1 PE=1 SV=1	A0A1B0GV68	0.7466	0.00757852
A0A1B0GV68 1xPhospho [S652(98.8)]	A0A1B0GV68	FERM, RhoGEF and pleckstrin domain-containing protein 1 OS=Homo sapiens GN=FARP1 PE=1 SV=1	A0A1B0GV68	0.730757	0.00564137
A0A1B0GV68 2xPhospho [S/T]	A0A1B0GV68	FERM, RhoGEF and pleckstrin domain-containing protein 1 OS=Homo sapiens GN=FARP1 PE=1 SV=1	A0A1B0GV68	0.638798	0.000409265
A0A1B0GV68 1xPhospho [S427(100)]; C9JME2 1xPhospho [S427(100)]	A0A1B0GV68; C9JME2	FERM, RhoGEF and pleckstrin domain-containing protein 1 OS=Homo sapiens GN=FARP1 PE=1 SV=1;FERM, RhoGEF and pleckstrin domain-containing protein 1 OS=Homo sapiens GN=FARP1 PE=1 SV=2	A0A1B0GV68; Q9Y4F1-2; C9JME2; Q9Y4F1	0.749573	0.0104303
A0A1B0GV68 1xPhospho [T24(99.8)]; C9JME2 1xPhospho [T24(99.8)]	A0A1B0GV68; C9JME2	FERM, RhoGEF and pleckstrin domain-containing protein 1 OS=Homo sapiens GN=FARP1 PE=1 SV=1;FERM, RhoGEF and pleckstrin domain-containing protein 1 OS=Homo sapiens GN=FARP1 PE=1 SV=2	A0A1B0GV68; Q9Y4F1-2; Q9Y4F1-3; C9JME2; Q9Y4F1; M0QYB0	0.715112	0.00848453
A1L170-2 1xPhospho [S292(100)]	A1L170-2	Isoform 2 of Uncharacterized protein C1orf226 OS=Homo sapiens GN=C1orf226	A1L170-2; A1L170	0.562666	0.0148653
A6ND36 1xPhospho [S356(100)]	A6ND36	Protein FAM83G OS=Homo sapiens GN=FAM83G PE=1 SV=2	A6ND36-2; A6ND36	0.763591	0.031343
A9UHW6-3 1xPhospho [S262(100)]	A9UHW6-3	Isoform 3 of MIF4G domain-containing protein OS=Homo sapiens GN=MIF4GD	A9UHW6-2; J3QLJ5; A9UHW6; J3KSB8; A9UHW6-3	0.744942	0.000565232
A9Z1X7 2xPhospho [S747(100); S]	A9Z1X7	Serine/arginine repetitive matrix protein 1 OS=Homo sapiens GN=SRRM1 PE=1 SV=1	Q8IYB3; E9PCT1; A9Z1X7; Q8IYB3-2	0.749927	0.00182096
B4DTS2 1xPhospho [S710(100)]	B4DTS2	Serine/threonine-protein kinase OS=Homo sapiens GN=PRKD2 PE=1 SV=1	Q9BZL6; Q9BZL6-2; B4DTS2	0.609884	0.0102073
B5MCU0 2xPhospho [S139(98.9); S/Y/T]; Q15032-3 2xPhospho [S138(98.9); S/Y/T]	B5MCU0; Q15032-3	R3H domain-containing protein 2 OS=Homo sapiens GN=R3HDM2 PE=1 SV=1;Isoform 3 of R3H domain-containing protein 1 OS=Homo sapiens GN=R3HDM1	H0YIX9; H7C2F9; B5MCG9; B5MCU0; Q15032-3; Q15032-4; A0A0U1RRA6; Q15032-2; Q15032; Q9Y2K5	0.747453	0.0095907
D3DTX6 1xPhospho [S]	D3DTX6	Neurabin-2 OS=Homo sapiens GN=PPP1R9B PE=1 SV=1	D3DTX6; Q96SB3	0.711	0.00939471
D6REX3 1xPhospho [S527(100)]	D6REX3	Protein transport protein Sec31A OS=Homo sapiens GN=SEC31A PE=1 SV=1	O94979-8; D6REX3; H0Y8V7; O94979-3; D6RHZ5; O94979-2; O94979; O94979-9	0.532267	0.00381467
D6REX3 2xPhospho [S527(100); S532(100)]	D6REX3	Protein transport protein Sec31A OS=Homo sapiens GN=SEC31A PE=1 SV=1	O94979-8; D6REX3; H0Y8V7; O94979-3; D6RHZ5; O94979-2; O94979; O94979-9	0.657519	0.00293813
E7ERS3 1xPhospho [S917(100)]	E7ERS3	Zinc finger CCCH domain-containing protein 18 OS=Homo sapiens GN=ZC3H18 PE=1 SV=1	Q86VM9; H3BRH3; E7ERS3	0.617058	0.00238984
E7EUC7 1xPhospho [S22(100)]	E7EUC7	UTP--glucose-1-phosphate uridylyltransferase OS=Homo sapiens GN=UGP2 PE=1 SV=1	E7EUC7; Q16851; A0A087WYS1; C9J6Q0	0.671594	0.00035898
E7EVA0 2xPhospho [T538(99); S/T]	E7EVA0	Microtubule-associated protein OS=Homo sapiens GN=MAP4 PE=1 SV=1	P27816; E7EVA0; P27816-6; P27816-2	0.578387	0.0226836
E7EX17 1xPhospho [S602(100)]	E7EX17	Eukaryotic translation initiation factor 4B OS=Homo sapiens GN=EIF4B PE=1 SV=1	E7EX17; P23588; P23588-2	0.719145	0.00327515
E9PAU2 1xPhospho [S634(100)]	E9PAU2	Ribonucleoprotein PTB-binding 1 OS=Homo sapiens GN=RAVER1 PE=1 SV=1	Q8IY67-2; A0A087WZ13; E9PAU2; K7EQG2	0.731626	0.012877
E9PDI4 1xPhospho [T/S]	E9PDI4	Ladinin-1 OS=Homo sapiens GN=LAD1 PE=1 SV=1	O00515; H0Y901; E9PDI4	0.73191	0.0257952
E9PDI4 1xPhospho [S526(99.8)]	E9PDI4	Ladinin-1 OS=Homo sapiens GN=LAD1 PE=1 SV=1	O00515; E9PDI4	0.741199	0.00853527
E9PDI4 1xPhospho [S408(100)]	E9PDI4	Ladinin-1 OS=Homo sapiens GN=LAD1 PE=1 SV=1	O00515; H0Y901; E9PDI4	0.68883	0.0216453
E9PDJ2 2xPhospho [S188(100); S192(100)]	E9PDJ2	Calcipressin-1 OS=Homo sapiens GN=RCAN1 PE=1 SV=1	Q9UKA8-6; E9PDJ2; E9PD55; H0YF64; P53805-2; P53805; Q9UKA8-2; V9GYW9; P53805-3; Q9UKA8-5; Q9UKA8; P53805-4	0.757425	0.000161007
G3V1L9 2xPhospho [S125(99.1); S/Y]; G5E9E7 2xPhospho [S129(99.1); S/Y]	G3V1L9; G5E9E7	Tight junction protein 1 (Zona occludens 1), isoform CRA_a OS=Homo sapiens GN=TJP1 PE=1 SV=1;Tight junction protein 1 (Zona occludens 1), isoform CRA_e OS=Homo sapiens GN=TJP1 PE=1 SV=1	Q07157-2; A0A087X0K9; G3V1L9; G5E9E7; Q07157; H0YKB1	0.704103	0.0163055
H0Y304 2xPhospho [T1104(100); S1108(99.4)]	H0Y304	Dystrophin (Fragment) OS=Homo sapiens GN=DMD PE=1 SV=1	P11532-5; P11532-8; H0Y304; F8VX32	0.690008	0.00421829
I3L2J0 1xPhospho [S1082(99.8)]	I3L2J0	Protein capicua homolog OS=Homo sapiens GN=CIC PE=1 SV=1	I3L2J0; A0A0A0MQR4; Q96RK0	0.755965	0.00222375
J3KN59 1xPhospho [S235(100)]	J3KN59	BCL2/adenovirus E1B 19 kDa protein-interacting protein 2 OS=Homo sapiens GN=BNIP2 PE=1 SV=1	Q12982-2; J3KN59; Q12982	0.744217	0.0334587
J3KP75 1xPhospho [S72(100)]	J3KP75	Phosphatase and actin regulator OS=Homo sapiens GN=PHACTR2 PE=1 SV=1	J3KP75	0.408052	0.00423401
J3QR07 1xPhospho [S/Y]	J3QR07	YTH domain-containing protein 1 OS=Homo sapiens GN=YTHDC1 PE=1 SV=1	J3QR07; Q96MU7; Q96MU7-2	0.479493	5.4714e-05
J3QRS3 1xPhospho [T/S]	J3QRS3	Myosin regulatory light chain 12A OS=Homo sapiens GN=MYL12A PE=1 SV=1	P24844; O14950; J3KTJ1; J3QRS3; P19105; P24844-2	0.521811	0.00702722
J3QRS3 1xPhospho [T/S]	J3QRS3	Myosin regulatory light chain 12A OS=Homo sapiens GN=MYL12A PE=1 SV=1	P24844; O14950; J3KTJ1; J3QRS3; P19105; P24844-2	0.489921	0.00738998
K7EN65 1xPhospho [S/T]	K7EN65	Methyl-CpG-binding domain protein 1 (Fragment) OS=Homo sapiens GN=MBD1 PE=1 SV=1	K7EN65	0.667217	0.0123919
M0R088 1xPhospho [S511(100)]; A9Z1X7 1xPhospho [S547(100)]	M0R088; A9Z1X7	Serine/arginine repetitive matrix protein 1 (Fragment) OS=Homo sapiens GN=SRRM1 PE=1 SV=1;Serine/arginine repetitive matrix protein 1 OS=Homo sapiens GN=SRRM1 PE=1 SV=1	M0R088; A9Z1X7	0.559819	0.000432983
M0R088 2xPhospho [S609(100); S611(100)]; A9Z1X7 2xPhospho [S645(100); S647(100)]	M0R088; A9Z1X7	Serine/arginine repetitive matrix protein 1 (Fragment) OS=Homo sapiens GN=SRRM1 PE=1 SV=1;Serine/arginine repetitive matrix protein 1 OS=Homo sapiens GN=SRRM1 PE=1 SV=1	Q8IYB3; E9PCT1; M0R088; A9Z1X7; Q8IYB3-2	0.719961	0.040406
M0R088 2xPhospho [S409(100); S411(100)]; A9Z1X7 2xPhospho [S445(100); S447(100)]	M0R088; A9Z1X7	Serine/arginine repetitive matrix protein 1 (Fragment) OS=Homo sapiens GN=SRRM1 PE=1 SV=1;Serine/arginine repetitive matrix protein 1 OS=Homo sapiens GN=SRRM1 PE=1 SV=1	Q8IYB3; E9PCT1; M0R088; A9Z1X7; Q8IYB3-2	0.705081	0.011391
O00192 1xPhospho [S335(100)]	O00192	Armadillo repeat protein deleted in velo-cardio-facial syndrome OS=Homo sapiens GN=ARVCF PE=1 SV=1	O00192-2; C9JJX6; E9PDC3; O00192	0.699623	0.000327195
O00566 3xPhospho [S163(99.4); S167(100); S171(100)]	O00566	U3 small nucleolar ribonucleoprotein protein MPP10 OS=Homo sapiens GN=MPHOSPH10 PE=1 SV=2	O00566; U3KQ48	0.648563	0.00230098
O00567 2xPhospho [S569(100); S570(100)]	O00567	Nucleolar protein 56 OS=Homo sapiens GN=NOP56 PE=1 SV=4	O00567	0.704582	0.015074
O14974 1xPhospho [T/S/Y]	O14974	Protein phosphatase 1 regulatory subunit 12A OS=Homo sapiens GN=PPP1R12A PE=1 SV=1	O14974; H0YHI8; O14974-2; H0YIS4; F8VZN8; O14974-3; O14974-4; O14974-5	0.769193	0.000431035
O43493 1xPhospho [S/T]	O43493	Trans-Golgi network integral membrane protein 2 OS=Homo sapiens GN=TGOLN2 PE=1 SV=2	O43493-2; O43493-3; O43493; F8W8W7; J3KQ45; O43493-5	0.761614	0.00398329
O43707	O43707	Alpha-actinin-4 OS=Homo sapiens GN=ACTN4 PE=1 SV=2	P12814-2; G3V2W4; H9KV75; P12814; P12814-3; P12814-4; O43707; G3V2N5	0.535429	5.00092e-06
O43896 2xPhospho [S674(100); S676(100)]	O43896	Kinesin-like protein KIF1C OS=Homo sapiens GN=KIF1C PE=1 SV=3	O43896	0.66859	0.00457042
O60271 1xPhospho [S733(99.6)]; A0A087X2D8 1xPhospho [S724(99.6)]	O60271; A0A087X2D8	C-Jun-amino-terminal kinase-interacting protein 4 OS=Homo sapiens GN=SPAG9 PE=1 SV=4;C-Jun-amino-terminal kinase-interacting protein 4 OS=Homo sapiens GN=SPAG9 PE=1 SV=1	O60271-3; O60271-5; O60271-9; O60271; O60271-2; A0A087X2D8; O60271-4	0.639133	0.0117976
O60333-4 1xPhospho [S1454(99.8)]	O60333-4	Isoform 4 of Kinesin-like protein KIF1B OS=Homo sapiens GN=KIF1B	Q4R9M9; A0A087WWA3; O60333-4; O60333; O60333-2; A0A0U1RQL3	0.666478	0.000130343
O60716-3 1xPhospho [T932(99.8)]	O60716-3	Isoform 1AC of Catenin delta-1 OS=Homo sapiens GN=CTNND1	O60716-8; O60716-7; O60716-13; O60716-31; O60716-23; O60716-3; O60716-15; O60716-27; O60716-11; O60716-32; O60716-19; O60716-5; O60716-29; O60716-24; O60716-16; O60716-21	0.563107	0.000442897
O60716-3 1xPhospho [S230(100)]	O60716-3	Isoform 1AC of Catenin delta-1 OS=Homo sapiens GN=CTNND1	O60716-10; O60716-2; O60716-12; C9JZR2; O60716-8; O60716-17; O60716-7; O60716-13; O60716-23; O60716; O60716-3; O60716-15; O60716-9; O60716-4; O60716-11; O60716-18; O60716-19; O60716-14; O60716-20; O60716-5; O60716-6; O60716-22; E9PRE2; O60716-24; O60716-16; O60716-21	0.764483	0.0484452
O60841 2xPhospho [S135(99.6); S137(99.6)]	O60841	Eukaryotic translation initiation factor 5B OS=Homo sapiens GN=EIF5B PE=1 SV=4	O60841; A0A087WUT6	0.412485	0.00518444
O60841 1xPhospho [S164(100)]	O60841	Eukaryotic translation initiation factor 5B OS=Homo sapiens GN=EIF5B PE=1 SV=4	O60841; A0A087WUT6	0.767935	0.0147801
O60841 2xPhospho [S107(100); S113(100)]	O60841	Eukaryotic translation initiation factor 5B OS=Homo sapiens GN=EIF5B PE=1 SV=4	O60841; A0A087WUT6	0.473862	0.00122838
O75179 1xPhospho [S1709(100)]	O75179	Ankyrin repeat domain-containing protein 17 OS=Homo sapiens GN=ANKRD17 PE=1 SV=3	O75179; O75179-4; O75179-7; H0YM23; O75179-6; O75179-2	0.505849	0.00272598
O75694 1xPhospho [S992(99.7)]	O75694	Nuclear pore complex protein Nup155 OS=Homo sapiens GN=NUP155 PE=1 SV=1	O75694; E9PF10; O75694-2	0.605249	0.000376481
O95365 1xPhospho [S337(100)]	O95365	Zinc finger and BTB domain-containing protein 7A OS=Homo sapiens GN=ZBTB7A PE=1 SV=1	O95365	0.660936	0.00871235
O95365 1xPhospho [S549(100)]	O95365	Zinc finger and BTB domain-containing protein 7A OS=Homo sapiens GN=ZBTB7A PE=1 SV=1	O95365	0.635797	0.0267154
O95365 1xPhospho [S/T]	O95365	Zinc finger and BTB domain-containing protein 7A OS=Homo sapiens GN=ZBTB7A PE=1 SV=1	O95365	0.717115	0.0113116
O95365 1xPhospho [S337(100)]	O95365	Zinc finger and BTB domain-containing protein 7A OS=Homo sapiens GN=ZBTB7A PE=1 SV=1	O95365	0.656031	0.00673624
O95544-2 1xPhospho [S64(100)]	O95544-2	Isoform 2 of NAD kinase OS=Homo sapiens GN=NADK	O95544-2; O95544	0.757866	0.00459061
P02686 1xPhospho [T/S]	P02686	Myelin basic protein OS=Homo sapiens GN=MBP PE=1 SV=3	J3KS94; J3QQK6; P02686; P02686-2	0.7064	0.000396546
P04792 1xPhospho [S82(99.7)]	P04792	Heat shock protein beta-1 OS=Homo sapiens GN=HSPB1 PE=1 SV=2	P04792; F8WE04	0.68373	1.05924e-06
P05783 1xPhospho [S/T]	P05783	Keratin, type I cytoskeletal 18 OS=Homo sapiens GN=KRT18 PE=1 SV=2	P05783; F8VZY9	0.660773	0.0014557
P05783 1xPhospho [S399(99.5)]	P05783	Keratin, type I cytoskeletal 18 OS=Homo sapiens GN=KRT18 PE=1 SV=2	P05783	0.60296	0.0197032
P05783 1xPhospho [S53(98.2)]	P05783	Keratin, type I cytoskeletal 18 OS=Homo sapiens GN=KRT18 PE=1 SV=2	P05783; F8VZY9	0.642975	0.00067173
P05783 1xPhospho [S127(100)]	P05783	Keratin, type I cytoskeletal 18 OS=Homo sapiens GN=KRT18 PE=1 SV=2	P05783; F8VZY9	0.690909	0.000732318
P05783 1xPhospho [S7(99.7)]	P05783	Keratin, type I cytoskeletal 18 OS=Homo sapiens GN=KRT18 PE=1 SV=2	P05783; F8VZY9	0.749844	0.0116885
P05787-2	P05787-2	Isoform 2 of Keratin, type II cytoskeletal 8 OS=Homo sapiens GN=KRT8	H0YIB2; P05787-2; F8VUG2; F8VP67; F8W1U3; P05787	0.719234	0.00544938
P05787-2 1xPhospho [S132(100)]	P05787-2	Isoform 2 of Keratin, type II cytoskeletal 8 OS=Homo sapiens GN=KRT8	Q5XKE5; F8W1S1; P08729; Q7Z794; F8W0C6; Q7RTS7; Q86Y46; P35908; F8VS61; P04259; P02538; Q01546; O95678; Q14CN4-2; P05787-2; P48668; Q9NSB2; P12035; F8VUG2; Q3SY84; Q14CN4-3; Q14CN4; H0YHD9; P19013; F8W1U3; P05787; Q86Y46-2; P13647	0.765796	0.000889503
P05787-2 1xPhospho [S302(100)]	P05787-2	Isoform 2 of Keratin, type II cytoskeletal 8 OS=Homo sapiens GN=KRT8	O95678; P05787-2; P05787	0.758763	0.00111736
P05787-2 1xPhospho [S62(99.7)]	P05787-2	Isoform 2 of Keratin, type II cytoskeletal 8 OS=Homo sapiens GN=KRT8	F8VQY3; P05787-2; F8VUG2; F8W1U3; P05787	0.749725	0.00044572
P05787-2 1xPhospho [S59(100)]	P05787-2	Isoform 2 of Keratin, type II cytoskeletal 8 OS=Homo sapiens GN=KRT8	F8VQY3; P05787-2; F8VUG2; F8W1U3; P05787	0.711654	0.00181416
P05787-2	P05787-2	Isoform 2 of Keratin, type II cytoskeletal 8 OS=Homo sapiens GN=KRT8	P05787-2; F8VUG2; P05787	0.711473	8.9771e-06
P05787-2	P05787-2	Isoform 2 of Keratin, type II cytoskeletal 8 OS=Homo sapiens GN=KRT8	O95678; P05787-2; F8VUG2; P05787	0.738183	0.000643339
P05787-2	P05787-2	Isoform 2 of Keratin, type II cytoskeletal 8 OS=Homo sapiens GN=KRT8	F8VQY3; P05787-2; F8VUG2; F8W1U3; P05787	0.758822	6.55667e-06
P05787-2 1xPhospho [S/Y]	P05787-2	Isoform 2 of Keratin, type II cytoskeletal 8 OS=Homo sapiens GN=KRT8	P05787-2; F8VUG2; F8VP67; F8W1U3; P05787	0.760739	0.00391561
P07199 1xPhospho [S156(100)]	P07199	Major centromere autoantigen B OS=Homo sapiens GN=CENPB PE=1 SV=2	P07199	0.619063	0.000191037
P07602	P07602	Prosaposin OS=Homo sapiens GN=PSAP PE=1 SV=2	P07602	0.7571	0.0184146
P07858	P07858	Cathepsin B OS=Homo sapiens GN=CTSB PE=1 SV=3	P07858; E9PNL5; E9PLY3; E9PKQ7; E9PSG5; E9PHZ5; E9PQM1	0.74748	2.73451e-05
P09525	P09525	Annexin A4 OS=Homo sapiens GN=ANXA4 PE=1 SV=4	P09525	0.749666	0.00335493
P10451 1xPhospho [S303(100)]	P10451	Osteopontin OS=Homo sapiens GN=SPP1 PE=1 SV=1	P10451-4; P10451-5; P10451; P10451-3; P10451-2	0.766579	0.000156155
P10451 2xPhospho [S/T]	P10451	Osteopontin OS=Homo sapiens GN=SPP1 PE=1 SV=1	P10451-4; P10451	0.728234	0.00419372
P11171 1xPhospho [S555(99.2)]	P11171	Protein 4.1 OS=Homo sapiens GN=EPB41 PE=1 SV=4	P11171-7; P11171-3; Q4VB86; P11171; P11171-2; P11171-5; P11171-4; P11171-6	0.757544	0.00280312
P16104 1xPhospho [S140(100)]	P16104	Histone H2AX OS=Homo sapiens GN=H2AFX PE=1 SV=2	P16104	0.665833	0.000564982
P17029 1xPhospho [S13(100)]	P17029	Zinc finger protein with KRAB and SCAN domains 1 OS=Homo sapiens GN=ZKSCAN1 PE=1 SV=3	C9JRM9; P17029	0.640627	0.0126423
P18615-3 1xPhospho [S122(100)]	P18615-3	Isoform 2 of Negative elongation factor E OS=Homo sapiens GN=NELFE	A0A0A0MSN9; P18615; E9PD43; P18615-4; A2ABK4; P18615-3; A0A0A0MT02; A0A0G2JI50	0.743111	0.000128455
P19338 3xPhospho [S28(100); S34(100); S]	P19338	Nucleolin OS=Homo sapiens GN=NCL PE=1 SV=3	C9J1H7; C9JWL1; P19338; C9JLB1; C9JYW2	0.691772	0.00758186
P21796 1xPhospho [S104(100)]	P21796	Voltage-dependent anion-selective channel protein 1 OS=Homo sapiens GN=VDAC1 PE=1 SV=2	P21796; C9JI87	0.683164	0.00168076
P21980	P21980	Protein-glutamine gamma-glutamyltransferase 2 OS=Homo sapiens GN=TGM2 PE=1 SV=2	P21980-3; A2A299; P21980-2; P21980; A2A2A0	0.662762	1.40393e-05
P22059 2xPhospho [S190(100); S193(100)]	P22059	Oxysterol-binding protein 1 OS=Homo sapiens GN=OSBP PE=1 SV=1	P22059	0.756604	0.0382331
P22626	P22626	Heterogeneous nuclear ribonucleoproteins A2/B1 OS=Homo sapiens GN=HNRNPA2B1 PE=1 SV=2	A0A087WUI2; P22626-2; P22626	0.755255	0.00352889
P28290 2xPhospho [S665(100); S668(100)]	P28290	Sperm-specific antigen 2 OS=Homo sapiens GN=SSFA2 PE=1 SV=3	E9PHV5; P28290; P28290-3; E7EUL7; P28290-2	0.662766	0.0298556
P29590 1xPhospho [S36(100)]	P29590	Protein PML OS=Homo sapiens GN=PML PE=1 SV=3	P29590-5; P29590-13; P29590-12; P29590-2; P29590-14; P29590-4; P29590-10; P29590-9; P29590-8; P29590; H3BT57; P29590-3; P29590-11	0.699082	0.0102314
P31629 2xPhospho [S1443(99.8); S/T]	P31629	Transcription factor HIVEP2 OS=Homo sapiens GN=HIVEP2 PE=1 SV=2	P31629	0.669861	4.40368e-05
P31629 2xPhospho [S/T]	P31629	Transcription factor HIVEP2 OS=Homo sapiens GN=HIVEP2 PE=1 SV=2	P31629	0.540053	9.81785e-05
P35568 1xPhospho [S374(100)]	P35568	Insulin receptor substrate 1 OS=Homo sapiens GN=IRS1 PE=1 SV=1	P35568	0.72089	0.00896882
P35579 1xPhospho [S1943(100)]	P35579	Myosin-9 OS=Homo sapiens GN=MYH9 PE=1 SV=4	P35579; P35579-2	0.604337	0.00700501
P35900 1xPhospho [S/T]	P35900	Keratin, type I cytoskeletal 20 OS=Homo sapiens GN=KRT20 PE=1 SV=1	P35900	0.731235	9.42918e-05
P37173-2 1xPhospho [S/T]	P37173-2	Isoform 2 of TGF-beta receptor type-2 OS=Homo sapiens GN=TGFBR2	P37173-2; P37173	0.726493	0.0199062
P45880-1 1xPhospho [S130(100)]	P45880-1	Isoform 1 of Voltage-dependent anion-selective channel protein 2 OS=Homo sapiens GN=VDAC2	Q5JSD2; A0A0A0MR02; Q5JSD1; P45880; P45880-2; P45880-1	0.718085	0.00167394
P49006 1xPhospho [S104(100)]	P49006	MARCKS-related protein OS=Homo sapiens GN=MARCKSL1 PE=1 SV=2	P49006	0.260208	0.00115123
P49585 2xPhospho [S343(100); S347(100)]	P49585	Choline-phosphate cytidylyltransferase A OS=Homo sapiens GN=PCYT1A PE=1 SV=2	P49585; C9JEJ2	0.651389	0.0019053
P49585 3xPhospho [S315(100); S319(100); S323(97.9)]	P49585	Choline-phosphate cytidylyltransferase A OS=Homo sapiens GN=PCYT1A PE=1 SV=2	P49585; C9JEJ2	0.563669	0.000109095
P49585 3xPhospho [S315(99.1); S323(98.1); S/T]	P49585	Choline-phosphate cytidylyltransferase A OS=Homo sapiens GN=PCYT1A PE=1 SV=2	P49585; C9JEJ2	0.591484	0.000186669
P49585 2xPhospho [S]	P49585	Choline-phosphate cytidylyltransferase A OS=Homo sapiens GN=PCYT1A PE=1 SV=2	P49585; C9JEJ2	0.703982	0.000746899
P49585 1xPhospho [S315(100)]; Q9Y5K3 1xPhospho [S315(100)]	P49585; Q9Y5K3	Choline-phosphate cytidylyltransferase A OS=Homo sapiens GN=PCYT1A PE=1 SV=2;Choline-phosphate cytidylyltransferase B OS=Homo sapiens GN=PCYT1B PE=1 SV=1	P49585; Q9Y5K3; C9JEJ2; Q9Y5K3-3; Q9Y5K3-2; Q9Y5K3-4	0.714058	0.000512479
P49756 1xPhospho [S583(100)]	P49756	RNA-binding protein 25 OS=Homo sapiens GN=RBM25 PE=1 SV=3	P49756	0.702722	0.012889
P49761 1xPhospho [S157(99)]	P49761	Dual specificity protein kinase CLK3 OS=Homo sapiens GN=CLK3 PE=1 SV=3	P49761-1; P49761-2; P49761-3; H3BQG1; H3BRK0; H3BQR7; H3BUL5; H3BV35; P49761; H3BRT8; H3BVF8	0.50659	0.00282026
P50479 1xPhospho [S112(99.8)]	P50479	PDZ and LIM domain protein 4 OS=Homo sapiens GN=PDLIM4 PE=1 SV=2	P50479-2; C9J542; P50479	0.697242	2.96789e-05
P50502 3xPhospho [S75(100); S76(100); S79(100)]	P50502	Hsc70-interacting protein OS=Homo sapiens GN=ST13 PE=1 SV=2	P50502; Q3KNR6; F6VDH7	0.619878	0.00150588
P51858-3 1xPhospho [S181(100)]	P51858-3	Isoform 3 of Hepatoma-derived growth factor OS=Homo sapiens GN=HDGF	P51858-3; P51858-2; P51858	0.639743	0.01824
P51858-3 2xPhospho [S148(100); S149(100)]	P51858-3	Isoform 3 of Hepatoma-derived growth factor OS=Homo sapiens GN=HDGF	P51858-3; P51858-2; P51858	0.488476	0.00432196
P51858-3 2xPhospho [S148(100); S149(100)]	P51858-3	Isoform 3 of Hepatoma-derived growth factor OS=Homo sapiens GN=HDGF	P51858-3; P51858-2; P51858	0.407739	0.00500059
P52594-4 2xPhospho [T177(100); S/T]	P52594-4	Isoform 4 of Arf-GAP domain and FG repeat-containing protein 1 OS=Homo sapiens GN=AGFG1	B8ZZY2; C9J2I0; P52594-3; P52594; P52594-4; P52594-2	0.619109	0.024595
P54259 1xPhospho [S645(100)]	P54259	Atrophin-1 OS=Homo sapiens GN=ATN1 PE=1 SV=3	P54259	0.76198	0.00152095
P62753 2xPhospho [S240(99.2); S/T]	P62753	40S ribosomal protein S6 OS=Homo sapiens GN=RPS6 PE=1 SV=1	A2A3R5; P62753	0.75967	0.0178869
P82909 1xPhospho [S/Y/T]	P82909	28S ribosomal protein S36, mitochondrial OS=Homo sapiens GN=MRPS36 PE=1 SV=2	P82909	0.764273	0.0133568
P84157 1xPhospho [S]	P84157	Matrix-remodeling-associated protein 7 OS=Homo sapiens GN=MXRA7 PE=1 SV=1	P84157-3; P84157; P84157-2	0.726018	0.00348366
P84157 1xPhospho [S144(100)]	P84157	Matrix-remodeling-associated protein 7 OS=Homo sapiens GN=MXRA7 PE=1 SV=1	Q6ZR64; P84157-3; P84157; P84157-2	0.651003	0.00309447
Q01433 1xPhospho [S100(100)]	Q01433	AMP deaminase 2 OS=Homo sapiens GN=AMPD2 PE=1 SV=2	Q01433; H0YCL9; Q01433-2; E9PJF6; H0Y360	0.633261	0.00654064
Q01433 1xPhospho [S168(100)]	Q01433	AMP deaminase 2 OS=Homo sapiens GN=AMPD2 PE=1 SV=2	Q01433; H0YCL9; E9PIJ1; Q01433-2; Q01433-5; E9PJF6; Q01433-3; Q01433-4; H0Y360	0.50157	0.00345593
Q01970 1xPhospho [S537(100)]	Q01970	1-phosphatidylinositol 4,5-bisphosphate phosphodiesterase beta-3 OS=Homo sapiens GN=PLCB3 PE=1 SV=2	Q01970; Q01970-2	0.678205	0.0044014
Q05655-2 1xPhospho [S676(99.7)]	Q05655-2	Isoform 2 of Protein kinase C delta type OS=Homo sapiens GN=PRKCD	Q05655-2; Q05655	0.151164	3.29641e-06
Q08495-2 1xPhospho [S/T/Y]	Q08495-2	Isoform 2 of Dematin OS=Homo sapiens GN=DMTN	Q08495-2; Q08495-3	0.764738	0.00159707
Q12846 2xPhospho [S14(100); S15(100)]	Q12846	Syntaxin-4 OS=Homo sapiens GN=STX4 PE=1 SV=2	A0A087WWW0; Q12846; H3BMK2	0.65729	0.0136977
Q12906-7 1xPhospho [S/T]	Q12906-7	Isoform 7 of Interleukin enhancer-binding factor 3 OS=Homo sapiens GN=ILF3	Q12906-7; Q12906-6; Q12906-4	0.753763	0.00745152
Q13136 1xPhospho [T572(100)]	Q13136	Liprin-alpha-1 OS=Homo sapiens GN=PPFIA1 PE=1 SV=1	Q13136; Q13136-2	0.73275	0.0254991
Q13469 1xPhospho [S148(100)]	Q13469	Nuclear factor of activated T-cells, cytoplasmic 2 OS=Homo sapiens GN=NFATC2 PE=1 SV=2	Q13469; Q13469-4; Q13469-3; Q13469-2	0.357117	0.00895834
Q13547 1xPhospho [S393(100)]	Q13547	Histone deacetylase 1 OS=Homo sapiens GN=HDAC1 PE=1 SV=1	Q13547	0.651993	0.0329685
Q13625-3 1xPhospho [S/T]	Q13625-3	Isoform 3 of Apoptosis-stimulating of p53 protein 2 OS=Homo sapiens GN=TP53BP2	Q13625; Q13625-2; Q13625-3	0.677414	0.000249914
Q14103 1xPhospho [S]	Q14103	Heterogeneous nuclear ribonucleoprotein D0 OS=Homo sapiens GN=HNRNPD PE=1 SV=1	D6RD83; Q14103-3; Q14103; D6RAF8	0.622126	0.0086311
Q14103 2xPhospho [S80(99.6); S]	Q14103	Heterogeneous nuclear ribonucleoprotein D0 OS=Homo sapiens GN=HNRNPD PE=1 SV=1	D6RD83; Q14103-3; Q14103; D6RAF8	0.666809	0.00402667
Q14562 1xPhospho [S460(100)]	Q14562	ATP-dependent RNA helicase DHX8 OS=Homo sapiens GN=DHX8 PE=1 SV=1	F5H658; Q14562	0.739705	0.0100786
Q14693-7 1xPhospho [S379(99.7)]	Q14693-7	Isoform 7 of Phosphatidate phosphatase LPIN1 OS=Homo sapiens GN=LPIN1	Q14693-7; A0A0A0MS66; Q14693-2; Q14693-5; Q14693-6; Q14693; Q14693-3; Q14693-4	0.756673	0.00027634
Q15056 1xPhospho [S21(100)]	Q15056	Eukaryotic translation initiation factor 4H OS=Homo sapiens GN=EIF4H PE=1 SV=5	Q15056-2; Q15056	0.746053	0.0240617
Q15121-2 1xPhospho [S137(100)]	Q15121-2	Isoform 2 of Astrocytic phosphoprotein PEA-15 OS=Homo sapiens GN=PEA15	Q15121-2; Q15121; B1AKZ5	0.769612	0.000267054
Q15311 1xPhospho [S463(100)]	Q15311	RalA-binding protein 1 OS=Homo sapiens GN=RALBP1 PE=1 SV=3	Q15311	0.72418	0.0258106
Q15417 1xPhospho [S323(100)]	Q15417	Calponin-3 OS=Homo sapiens GN=CNN3 PE=1 SV=1	Q15417-3; Q15417-2; Q15417	0.697373	0.000527604
Q15643 1xPhospho [S1891(100)]	Q15643	Thyroid receptor-interacting protein 11 OS=Homo sapiens GN=TRIP11 PE=1 SV=3	Q15643; H0YJ97	0.693866	0.00931585
Q16658 1xPhospho [S39(99.8)]	Q16658	Fascin OS=Homo sapiens GN=FSCN1 PE=1 SV=3	Q16658	0.664862	0.000112037
Q5T5C0 1xPhospho [S782(99.7)]	Q5T5C0	Syntaxin-binding protein 5 OS=Homo sapiens GN=STXBP5 PE=1 SV=1	Q5T5C0; Q5T5C0-3; Q5JRH0; Q5T5C0-2; H0Y332	0.69775	0.00352296
Q5T7N3 1xPhospho [S/T]	Q5T7N3	KN motif and ankyrin repeat domain-containing protein 4 OS=Homo sapiens GN=KANK4 PE=2 SV=1	Q5T7N3	0.748712	0.0042544
Q5VT52 1xPhospho [S/T]	Q5VT52	Regulation of nuclear pre-mRNA domain-containing protein 2 OS=Homo sapiens GN=RPRD2 PE=1 SV=1	Q5VT52; Q5VT52-2; Q5VT52-3	0.741043	0.0418053
Q5VV41 1xPhospho [S107(100)]	Q5VV41	Rho guanine nucleotide exchange factor 16 OS=Homo sapiens GN=ARHGEF16 PE=1 SV=1	Q5VV41	0.638555	0.00255843
Q69YQ0 1xPhospho [S/T]	Q69YQ0	Cytospin-A OS=Homo sapiens GN=SPECC1L PE=1 SV=2	F8WAN1; Q69YQ0-2; Q69YQ0	0.743157	0.000186591
Q6KB66 1xPhospho [S/T]	Q6KB66	Keratin, type II cytoskeletal 80 OS=Homo sapiens GN=KRT80 PE=1 SV=2	Q6KB66; Q6KB66-2	0.66353	0.00730181
Q6KB66 1xPhospho [S451(100)]	Q6KB66	Keratin, type II cytoskeletal 80 OS=Homo sapiens GN=KRT80 PE=1 SV=2	Q6KB66-3; Q6KB66	0.764234	0.00125181
Q6P1M3 2xPhospho [S649(100); S653(100)]	Q6P1M3	Lethal(2) giant larvae protein homolog 2 OS=Homo sapiens GN=LLGL2 PE=1 SV=2	Q15334; A0A087WW77; J3QRV5; Q6P1M3-2; Q6P1M3	0.739377	0.0171				OS
Q6PCE3 1xPhospho [S175(100)]	Q6PCE3	Glucose 1,6-bisphosphate synthase OS=Homo sapiens GN=PGM2L1 PE=1 SV=3	Q6PCE3	0.693125	0.00256683
Q6WKZ4 1xPhospho [S/T]	Q6WKZ4	Rab11 family-interacting protein 1 OS=Homo sapiens GN=RAB11FIP1 PE=1 SV=3	Q6WKZ4; Q6WKZ4-3; Q6WKZ4-2; E7EX40	0.706455	0.00924183
Q6ZV65 2xPhospho [T158(100); Y/T]	Q6ZV65	Protein FAM47E OS=Homo sapiens GN=FAM47E PE=2 SV=3	U3KQR7; Q6ZV65-1; Q6ZV65; D6RBT2; Q6ZV65-2	0.727814	0.0353057
Q765P7 1xPhospho [S456(100)]	Q765P7	MTSS1-like protein OS=Homo sapiens GN=MTSS1L PE=1 SV=1	Q765P7; A0A087WXN9	0.758815	0.0271401
Q7Z417 1xPhospho [T/S]	Q7Z417	Nuclear fragile X mental retardation-interacting protein 2 OS=Homo sapiens GN=NUFIP2 PE=1 SV=1	Q7Z417	0.638371	0.00536192
Q86SQ0 2xPhospho [S200(99.8); S]	Q86SQ0	Pleckstrin homology-like domain family B member 2 OS=Homo sapiens GN=PHLDB2 PE=1 SV=2	Q86SQ0; Q86SQ0-2; Q86SQ0-3; E9PDY7; G5E9V3; E9PFQ4	0.684003	0.000283111
Q86SQ0 1xPhospho [S73(99.5)]	Q86SQ0	Pleckstrin homology-like domain family B member 2 OS=Homo sapiens GN=PHLDB2 PE=1 SV=2	Q86SQ0; Q86SQ0-2; Q86SQ0-3; E9PDY7; G5E9V3; E9PFQ4	0.746415	8.76498e-05
Q86WC4 1xPhospho [S325(100)]	Q86WC4	Osteopetrosis-associated transmembrane protein 1 OS=Homo sapiens GN=OSTM1 PE=1 SV=1	Q86WC4	0.755376	0.00540839
Q8IVT2 1xPhospho [S675(100)]	Q8IVT2	Mitotic interactor and substrate of PLK1 OS=Homo sapiens GN=MISP PE=1 SV=1	Q8IVT2	0.764425	5.12706e-05
Q8IVT2 1xPhospho [S575(100)]	Q8IVT2	Mitotic interactor and substrate of PLK1 OS=Homo sapiens GN=MISP PE=1 SV=1	Q8IVT2	0.755924	9.6503e-06
Q8IX03-2 2xPhospho [S899(99.5); T]	Q8IX03-2	Isoform 2 of Protein KIBRA OS=Homo sapiens GN=WWC1	Q8IX03-2; H0YAU4; H0YBE8; H3BLZ3; Q8IX03	0.706738	0.0056157
Q8N0Y2 1xPhospho [S/T]	Q8N0Y2	Zinc finger protein 444 OS=Homo sapiens GN=ZNF444 PE=1 SV=1	Q8N0Y2-2; Q8N0Y2	0.732935	0.00382592
Q8N122 1xPhospho [S722(99.7)]	Q8N122	Regulatory-associated protein of mTOR OS=Homo sapiens GN=RPTOR PE=1 SV=1	Q8N122-3; Q8N122	0.765439	0.000985766
Q8N370-3 1xPhospho [S297(99.8)]	Q8N370-3	Isoform 3 of Large neutral amino acids transporter small subunit 4 OS=Homo sapiens GN=SLC43A2	Q8N370; Q8N370-4; Q8N370-2; Q8N370-3	0.726702	0.0445017
Q8N392 2xPhospho [S69(99.4); S/Y]	Q8N392	Rho GTPase-activating protein 18 OS=Homo sapiens GN=ARHGAP18 PE=1 SV=3	Q8N392; Q8N392-2	0.589786	0.034952
Q8N3V7-2 1xPhospho [S894(100)]	Q8N3V7-2	Isoform 2 of Synaptopodin OS=Homo sapiens GN=SYNPO	Q8N3V7-2	0.569763	6.66676e-06
Q8N3V7-2 1xPhospho [S441(100)]	Q8N3V7-2	Isoform 2 of Synaptopodin OS=Homo sapiens GN=SYNPO	Q8N3V7-3; Q8N3V7-2; Q8N3V7	0.698276	0.000118438
Q8N3V7-2 1xPhospho [S19(100)]	Q8N3V7-2	Isoform 2 of Synaptopodin OS=Homo sapiens GN=SYNPO	Q8N3V7-3; Q8N3V7-2; Q8N3V7	0.712166	0.00573247
Q8N6H7 1xPhospho [S368(99.7)]	Q8N6H7	ADP-ribosylation factor GTPase-activating protein 2 OS=Homo sapiens GN=ARFGAP2 PE=1 SV=1	A0A0D9SF70; G5E9L0; Q8N6H7-2; E9PMU9; H0YDN9; E9PQP3; Q8N6H7-3; Q8N6H7	0.739911	0.0053298
Q8NC56 1xPhospho [S499(99.7)]	Q8NC56	LEM domain-containing protein 2 OS=Homo sapiens GN=LEMD2 PE=1 SV=1	H0Y9B7; Q8NC56-2; Q8NC56	0.582511	0.0211664
Q8ND56 2xPhospho [S192(99.8); S/T]	Q8ND56	Protein LSM14 homolog A OS=Homo sapiens GN=LSM14A PE=1 SV=3	Q8ND56-2; Q8ND56-3; Q8ND56	0.614001	0.0130033
Q8NDX6 1xPhospho [S44(100)]	Q8NDX6	Zinc finger protein 740 OS=Homo sapiens GN=ZNF740 PE=1 SV=1	Q8NDX6	0.727741	0.0135714
Q8NE71 2xPhospho [T108(100); S109(100)]	Q8NE71	ATP-binding cassette sub-family F member 1 OS=Homo sapiens GN=ABCF1 PE=1 SV=2	Q8NE71-2; Q8NE71; F5GYK6; Q5STZ8	0.617138	0.00103334
Q8NE71 3xPhospho [S105(100); T108(100); S109(100)]	Q8NE71	ATP-binding cassette sub-family F member 1 OS=Homo sapiens GN=ABCF1 PE=1 SV=2	Q8NE71-2; Q8NE71; F5GYK6; Q5STZ8	0.727437	0.00431998
Q8TB61 1xPhospho [S427(100)]	Q8TB61	Adenosine 3'-phospho 5'-phosphosulfate transporter 1 OS=Homo sapiens GN=SLC35B2 PE=1 SV=1	Q8TB61-5; Q8TB61-3; Q8TB61; Q8TB61-4; Q8TB61-2	0.76941	0.00287769
Q8TCJ2 2xPhospho [S498(100); S499(100)]	Q8TCJ2	Dolichyl-diphosphooligosaccharide--protein glycosyltransferase subunit STT3B OS=Homo sapiens GN=STT3B PE=1 SV=1	Q8TCJ2	0.703747	0.0147722
Q8TDD1-2 1xPhospho [S782(100)]	Q8TDD1-2	Isoform 2 of ATP-dependent RNA helicase DDX54 OS=Homo sapiens GN=DDX54	Q8TDD1; Q8TDD1-2	0.677048	0.0122825
Q8WUA7 1xPhospho [S/T]	Q8WUA7	TBC1 domain family member 22A OS=Homo sapiens GN=TBC1D22A PE=1 SV=2	Q8WUA7-3; A0A0A0MRY0; Q8WUA7; F8WDP1; Q8WUA7-4	0.726809	0.000811673
Q8WWI1-3 1xPhospho [T598(99.9)]	Q8WWI1-3	Isoform 3 of LIM domain only protein 7 OS=Homo sapiens GN=LMO7	E9PMT2; Q8WWI1-4; Q8WWI1-3; Q8WWI1; F8WD26; E9PMS6; Q8WWI1-2; A0A0A0MTE2; Q8WWI1-5; J3KP06; H0Y424; E9PMP7	0.361966	0.02894
Q8WX93 1xPhospho [S1121(99.3)]	Q8WX93	Palladin OS=Homo sapiens GN=PALLD PE=1 SV=3	Q8WX93-8; Q8WX93-5; Q8WX93-9; Q8WX93-4; Q8WX93-7; Q8WX93-2; Q8WX93; Q8WX93-3	0.641636	0.0279915
Q92766-2 1xPhospho [S1167(100)]	Q92766-2	Isoform 2 of Ras-responsive element-binding protein 1 OS=Homo sapiens GN=RREB1	A0A087X055; Q92766-2; Q92766; Q92766-5; Q92766-3	0.671285	0.0271011
Q92766-2 1xPhospho [S1708(100)]	Q92766-2	Isoform 2 of Ras-responsive element-binding protein 1 OS=Homo sapiens GN=RREB1	A0A087X055; Q92766-2; Q92766; Q92766-5; Q92766-3; Q92766-4	0.618975	0.0237189
Q969S3 1xPhospho [S143(100)]	Q969S3	Zinc finger protein 622 OS=Homo sapiens GN=ZNF622 PE=1 SV=1	Q969S3	0.653057	0.0010141
Q96B36-3 1xPhospho [S203(100)]	Q96B36-3	Isoform 3 of Proline-rich AKT1 substrate 1 OS=Homo sapiens GN=AKT1S1	Q96B36; Q96B36-2; Q96B36-3	0.695056	0.0140757
Q96B97 1xPhospho [S587(99.4)]	Q96B97	SH3 domain-containing kinase-binding protein 1 OS=Homo sapiens GN=SH3KBP1 PE=1 SV=2	Q96B97-3; Q96B97-2; Q96B97; Q5JPT2	0.75133	0.000779831
Q96G03 1xPhospho [S165(100)]	Q96G03	Phosphoglucomutase-2 OS=Homo sapiens GN=PGM2 PE=1 SV=4	Q96G03-2; Q96G03	0.640038	0.000807739
Q96N67-6 1xPhospho [S452(98.7)]	Q96N67-6	Isoform 6 of Dedicator of cytokinesis protein 7 OS=Homo sapiens GN=DOCK7	Q96N67; Q96N67-2; Q96N67-5; A0A1B0GUE9; Q96N67-6; Q96N67-7; A0A0U1RQT6; Q96N67-3; Q96N67-4	0.761514	0.00516418
Q96RT1-8 1xPhospho [S/T/Y]	Q96RT1-8	Isoform 8 of Erbin OS=Homo sapiens GN=ERBIN	Q96RT1-2; Q96RT1; Q96RT1-9; Q96RT1-8; Q96RT1-6; Q96RT1-4; Q96RT1-7; Q96RT1-3; Q96RT1-5	0.640133	0.000131275
Q99759-2 1xPhospho [S371(100)]	Q99759-2	Isoform 2 of Mitogen-activated protein kinase kinase kinase 3 OS=Homo sapiens GN=MAP3K3	J3QRB6; J3KRN4; Q99759; Q99759-2	0.768372	0.00159218
Q99959 2xPhospho [S102(100); T/S/Y]	Q99959	Plakophilin-2 OS=Homo sapiens GN=PKP2 PE=1 SV=2	Q99959; Q99959-2	0.605755	0.000531268
Q99959 1xPhospho [S251(100)]	Q99959	Plakophilin-2 OS=Homo sapiens GN=PKP2 PE=1 SV=2	Q99959; Q99959-2	0.700135	0.00583826
Q99959 1xPhospho [S82(99.1)]	Q99959	Plakophilin-2 OS=Homo sapiens GN=PKP2 PE=1 SV=2	Q99959; Q99959-2	0.710124	0.00722649
Q9BVG4 1xPhospho [S197(100)]	Q9BVG4	Protein PBDC1 OS=Homo sapiens GN=PBDC1 PE=1 SV=1	Q9BVG4	0.735491	0.0415501
Q9C075 2xPhospho [S61(99.5); S]	Q9C075	Keratin, type I cytoskeletal 23 OS=Homo sapiens GN=KRT23 PE=1 SV=2	Q9C075	0.69006	2.57681e-05
Q9C075 1xPhospho [S61(100)]	Q9C075	Keratin, type I cytoskeletal 23 OS=Homo sapiens GN=KRT23 PE=1 SV=2	Q9C075	0.699566	0.00176638
Q9C075 1xPhospho [S]	Q9C075	Keratin, type I cytoskeletal 23 OS=Homo sapiens GN=KRT23 PE=1 SV=2	Q9C075	0.734565	0.000392054
Q9C0C2 1xPhospho [S221(100)]	Q9C0C2	182 kDa tankyrase-1-binding protein OS=Homo sapiens GN=TNKS1BP1 PE=1 SV=4	Q9C0C2; E9PKK0	0.762479	0.00247034
Q9GZY8-2 2xPhospho [S129(100); S131(100)]; Q9GZY8-5 2xPhospho [S129(100); S131(100)]	Q9GZY8-2; Q9GZY8-5	Isoform 2 of Mitochondrial fission factor OS=Homo sapiens GN=MFF;Isoform 5 of Mitochondrial fission factor OS=Homo sapiens GN=MFF	Q9GZY8-4; Q9GZY8-3; Q9GZY8-2; H7C433; C9JHF5; Q9GZY8-5; Q9GZY8; A0A0A0MS29	0.638595	0.000335953
Q9H019 1xPhospho [S]	Q9H019	Mitochondrial fission regulator 1-like OS=Homo sapiens GN=MTFR1L PE=1 SV=2	E9PLD2; Q9H019-3; Q9H019; E9PPF9	0.766593	0.00142872
Q9H019 1xPhospho [S103(100)]	Q9H019	Mitochondrial fission regulator 1-like OS=Homo sapiens GN=MTFR1L PE=1 SV=2	E9PLD2; E9PPQ0; Q9H019-3; Q9H019; E9PSD6; E9PPF9; C9JF50; E9PNJ0; Q9H019-2; E9PRW1; E9PRK5; E9PLU1	0.742893	0.000536679
Q9H1E3 1xPhospho [S181(100)]	Q9H1E3	Nuclear ubiquitous casein and cyclin-dependent kinase substrate 1 OS=Homo sapiens GN=NUCKS1 PE=1 SV=1	Q9H1E3; Q9H1E3-2	0.678439	0.00392713
Q9H1E3 1xPhospho [S19(100)]	Q9H1E3	Nuclear ubiquitous casein and cyclin-dependent kinase substrate 1 OS=Homo sapiens GN=NUCKS1 PE=1 SV=1	Q9H1E3	0.737232	0.00216806
Q9H1E3 2xPhospho [S58(99.6); S61(100)]	Q9H1E3	Nuclear ubiquitous casein and cyclin-dependent kinase substrate 1 OS=Homo sapiens GN=NUCKS1 PE=1 SV=1	Q9H1E3	0.676635	0.000277836
Q9H6S3-3 1xPhospho [S]	Q9H6S3-3	Isoform 3 of Epidermal growth factor receptor kinase substrate 8-like protein 2 OS=Homo sapiens GN=EPS8L2	Q9H6S3-2; Q9H6S3-3; Q9H6S3	0.683695	0.0260038
Q9H8Y8-3 1xPhospho [S463(99.4)]	Q9H8Y8-3	Isoform 3 of Golgi reassembly-stacking protein 2 OS=Homo sapiens GN=GORASP2	Q9H8Y8-3; Q9H8Y8; Q9H8Y8-2	0.645215	0.0418846
Q9H9R9-3 1xPhospho [S239(100)]	Q9H9R9-3	Isoform 3 of Dysbindin domain-containing protein 1 OS=Homo sapiens GN=DBNDD1	Q9H9R9-2; Q9H9R9-3; Q9H9R9; H3BLZ2	0.70867	0.00236509
Q9H9R9-3 2xPhospho [S239(100); S241(99.5)]	Q9H9R9-3	Isoform 3 of Dysbindin domain-containing protein 1 OS=Homo sapiens GN=DBNDD1	Q9H9R9-2; Q9H9R9-3; Q9H9R9; H3BLZ2	0.721597	0.00910853
Q9HB90 1xPhospho [T394(100)]	Q9HB90	Ras-related GTP-binding protein C OS=Homo sapiens GN=RRAGC PE=1 SV=1	Q9HB90	0.588034	0.00057911
Q9HCL2 2xPhospho [S695(100); S]	Q9HCL2	Glycerol-3-phosphate acyltransferase 1, mitochondrial OS=Homo sapiens GN=GPAM PE=1 SV=3	Q9HCL2; Q5VW52	0.679991	0.00163051
Q9NSK0-3 1xPhospho [S583(99.8)]	Q9NSK0-3	Isoform 3 of Kinesin light chain 4 OS=Homo sapiens GN=KLC4	Q9NSK0; Q9NSK0-5; Q9NSK0-3	0.76752	0.00281641
Q9NSK0-3 1xPhospho [S629(99.8)]	Q9NSK0-3	Isoform 3 of Kinesin light chain 4 OS=Homo sapiens GN=KLC4	Q9NSK0; Q9NSK0-5; Q9NSK0-3	0.768902	0.0258985
Q9NXG2 2xPhospho [S86(100); S88(100)]	Q9NXG2	THUMP domain-containing protein 1 OS=Homo sapiens GN=THUMPD1 PE=1 SV=2	H3BNW0; Q9NXG2	0.564293	0.00396048
Q9NYF8 1xPhospho [S648(100)]	Q9NYF8	Bcl-2-associated transcription factor 1 OS=Homo sapiens GN=BCLAF1 PE=1 SV=2	E9PK91; E9PKI6; E9PQN2; E9PK09; Q9NYF8-3; Q9NYF8-4; Q9NYF8; Q9NYF8-2	0.546221	0.0201663
Q9NYF8 1xPhospho [S397(100)]	Q9NYF8	Bcl-2-associated transcription factor 1 OS=Homo sapiens GN=BCLAF1 PE=1 SV=2	E9PK91; E9PKI6; E9PQN2; E9PK09; Q9NYF8-3; Q9NYF8; Q9NYF8-2	0.543827	0.0175694
Q9NYF8 2xPhospho [S397(100); T402(99)]	Q9NYF8	Bcl-2-associated transcription factor 1 OS=Homo sapiens GN=BCLAF1 PE=1 SV=2	E9PK91; E9PKI6; E9PQN2; E9PK09; Q9NYF8-3; Q9NYF8; Q9NYF8-2	0.721053	0.00552174
Q9NYV4-2 2xPhospho [S236(99.3); S/Y]	Q9NYV4-2	Isoform 2 of Cyclin-dependent kinase 12 OS=Homo sapiens GN=CDK12	Q9NYV4-3; Q9NYV4-2; Q9NYV4; J3QSD7	0.637913	0.000216133
Q9NYV4-2 2xPhospho [S332(100); S]	Q9NYV4-2	Isoform 2 of Cyclin-dependent kinase 12 OS=Homo sapiens GN=CDK12	Q9NYV4-3; Q9NYV4-2; Q9NYV4; J3QSD7	0.637071	0.00318293
Q9NYV4-2 2xPhospho [S274(100); S276(100)]	Q9NYV4-2	Isoform 2 of Cyclin-dependent kinase 12 OS=Homo sapiens GN=CDK12	Q9NYV4-3; Q9NYV4-2; Q9NYV4; J3QSD7	0.595464	0.0144258
Q9NYV4-2 1xPhospho [S423(100)]	Q9NYV4-2	Isoform 2 of Cyclin-dependent kinase 12 OS=Homo sapiens GN=CDK12	Q9NYV4-3; Q9NYV4-2; Q9NYV4; J3QSD7	0.70868	0.00533599
Q9UEY8 3xPhospho [S673(100); S677(99.6); S]	Q9UEY8	Gamma-adducin OS=Homo sapiens GN=ADD3 PE=1 SV=1	Q9UEY8-2; Q9UEY8	0.76048	1.08561e-05
Q9UHD8 1xPhospho [S30(100)]	Q9UHD8	Septin-9 OS=Homo sapiens GN=SEPT9 PE=1 SV=2	Q9UHD8-7; Q9UHD8-2; Q9UHD8-5; Q9UHD8; K7ENL0; K7EPY1; K7EJV0	0.759917	0.000354879
Q9ULU4-19 2xPhospho [T/S]	Q9ULU4-19	Isoform 19 of Protein kinase C-binding protein 1 OS=Homo sapiens GN=ZMYND8	Q9ULU4-12; Q9ULU4-14; A0A087WYS3; Q9ULU4-5; Q9ULU4-19; Q9ULU4-8; Q9ULU4-13; A0A087WVZ6; Q9ULU4-4; Q9ULU4-3; Q9ULU4-22; Q9ULU4; Q9ULU4-18; Q9ULU4-6; Q9ULU4-21; Q9ULU4-15; Q9ULU4-9; Q9ULU4-10; Q9ULU4-17; Q9ULU4-20; Q9ULU4-7; Q9ULU4-11; Q9ULU4-23; A0A087WV57; H7C4X9; Q9ULU4-16	0.57383	1.60807e-05
Q9UN37 1xPhospho [S97(99.6)]	Q9UN37	Vacuolar protein sorting-associated protein 4A OS=Homo sapiens GN=VPS4A PE=1 SV=1	I3L4J1; Q9UN37	0.692709	0.0250676
Q9UN37 2xPhospho [S95(100); S97(100)]	Q9UN37	Vacuolar protein sorting-associated protein 4A OS=Homo sapiens GN=VPS4A PE=1 SV=1	I3L4J1; Q9UN37	0.740305	0.0137664
Q9UNZ2-5 1xPhospho [S142(95.8)]	Q9UNZ2-5	Isoform 3 of NSFL1 cofactor p47 OS=Homo sapiens GN=NSFL1C	F2Z2K0; Q9UNZ2-5; Q9UNZ2-6; Q9UNZ2	0.730284	0.00733957
Q9UQ35 3xPhospho [S1691(99.7); S1693(100); S1694(100)]	Q9UQ35	Serine/arginine repetitive matrix protein 2 OS=Homo sapiens GN=SRRM2 PE=1 SV=2	Q9UQ35; Q9UQ35-2	0.716273	0.0453638
Q9UQR1 1xPhospho [S306(99.8)]	Q9UQR1	Zinc finger protein 148 OS=Homo sapiens GN=ZNF148 PE=1 SV=2	Q9UQR1	0.749568	0.0265799
Q9Y261-2 1xPhospho [S/T]	Q9Y261-2	Isoform 2 of Hepatocyte nuclear factor 3-beta OS=Homo sapiens GN=FOXA2	Q9Y261; Q9Y261-2	0.692981	0.00103128
Q9Y2W1 1xPhospho [S575(100)]	Q9Y2W1	Thyroid hormone receptor-associated protein 3 OS=Homo sapiens GN=THRAP3 PE=1 SV=2	Q9Y2W1	0.755537	0.0349531
Q9Y383 1xPhospho [T/S]	Q9Y383	Putative RNA-binding protein Luc7-like 2 OS=Homo sapiens GN=LUC7L2 PE=1 SV=2	Q9Y383	0.709195	0.0438977
Q9Y3D3 1xPhospho [T130(99.8)]	Q9Y3D3	28S ribosomal protein S16, mitochondrial OS=Homo sapiens GN=MRPS16 PE=1 SV=1	Q9Y3D3	0.744232	0.00285216
Q9Y3Q8 1xPhospho [S/T]	Q9Y3Q8	TSC22 domain family protein 4 OS=Homo sapiens GN=TSC22D4 PE=1 SV=2	Q9Y3Q8	0.64219	0.0201876
Q9Y446-2 1xPhospho [S138(100)]	Q9Y446-2	Isoform PKP3b of Plakophilin-3 OS=Homo sapiens GN=PKP3	E9PQ15; Q9Y446-2; E9PK71; Q9Y446	0.594779	0.0339719
Q9Y446-2 1xPhospho [S]	Q9Y446-2	Isoform PKP3b of Plakophilin-3 OS=Homo sapiens GN=PKP3	Q9Y446-2; Q9Y446; E9PKC4	0.505498	0.00187688
Q9Y446-2 2xPhospho [T/S]	Q9Y446-2	Isoform PKP3b of Plakophilin-3 OS=Homo sapiens GN=PKP3	Q9Y446-2; Q9Y446; E9PKC4	0.65315	0.00374714
Q9Y450 1xPhospho [S67(100)]	Q9Y450	HBS1-like protein OS=Homo sapiens GN=HBS1L PE=1 SV=1	Q9Y450-2; Q9Y450; E9PN23; E9PMN1; G5E991; E9PLR4	0.766224	0.0154198
Q9Y4B5 1xPhospho [S549(98.7)]	Q9Y4B5	Microtubule cross-linking factor 1 OS=Homo sapiens GN=MTCL1 PE=1 SV=5	Q9Y4B5-3; J3QL92; Q9Y4B5-2; Q9Y4B5	0.449816	0.0379611
Q9Y4J8 1xPhospho [S564(99.4)]	Q9Y4J8	Dystrobrevin alpha OS=Homo sapiens GN=DTNA PE=1 SV=2	Q9Y4J8-10; Q9Y4J8-2; Q9Y4J8-11; M0QZ28; Q9Y4J8; Q9Y4J8-14; Q9Y4J8-13; Q9Y4J8-6; Q9Y4J8-15	0.763258	0.000485566
Q9Y5K3 2xPhospho [S315(100); S319(100)]	Q9Y5K3	Choline-phosphate cytidylyltransferase B OS=Homo sapiens GN=PCYT1B PE=1 SV=1	Q9Y5K3; Q9Y5K3-3; Q9Y5K3-4	0.655663	0.000773912
Q9Y5K3 3xPhospho [T/S]	Q9Y5K3	Choline-phosphate cytidylyltransferase B OS=Homo sapiens GN=PCYT1B PE=1 SV=1	Q9Y5K3; Q9Y5K3-3; Q9Y5K3-4	0.518201	0.000880116
Q9Y5K6 1xPhospho [S256(100)]	Q9Y5K6	CD2-associated protein OS=Homo sapiens GN=CD2AP PE=1 SV=1	Q9Y5K6	0.723952	0.00744804
R4GN35 2xPhospho [S1293(100); S1297(100)]	R4GN35	DENN domain-containing protein 4C OS=Homo sapiens GN=DENND4C PE=1 SV=1	X6R5W5; Q5VZ89-2; Q5VZ89-3; Q5VZ89; R4GN35; Q5VZ89-5; R4GNB2; Q5VZ89-6; X6RAE7	0.729742	0.00089138
